1     **PI 4-kinases promote cell surface expansion and facilitate tissue morphogenesis**  
2                     **during *Drosophila* cellularization and gastrulation**

3

4                             Wei Chen, Victoria Bergstein, Bing He\*

5                     Department of Biological Sciences, Dartmouth College, Hanover, NH, 03755

6

7                             \* Correspondence to: [bing.he@dartmouth.edu](mailto:bing.he@dartmouth.edu)

8

## 9 **Abstract**

10 During epithelial morphogenesis, dynamic cell shape change driven by intrinsic or extrinsic forces  
11 requires prompt regulation of cell surface area. Using *Drosophila* ventral furrow formation as a  
12 model, we identified the PI 4-kinase Fwd as an important regulator for apical constriction-mediated  
13 cell shape changes. These morphological changes involve prompt lateral surface expansion in the  
14 constricting cells and apical surface expansion in the non-constricting cells adjacent to the  
15 constriction domain, both of which are impeded upon depletion of Fwd. Computer modeling  
16 demonstrates that restricting apical and lateral cell surface expansion will result in specific tissue-  
17 level morphological abnormalities during furrow formation, which well predicts the phenotypes  
18 observed in the *fwd* deficient embryos. Fwd also promotes cell surface expansion during  
19 cellularization, but this function is largely redundant with another PI 4-kinase, PI4KII $\alpha$ . Together,  
20 our findings uncover an important role of Fwd in facilitating cell surface expansion in support of  
21 dynamic epithelial remodeling.

22

## 23 **Introduction**

24 During tissue morphogenesis, cells frequently undergo dynamic shape changes in response to  
25 intrinsic or extrinsic cell-generated forces. One important task for cells during this process is to  
26 adjust their surface area to accommodate the rapid cell shape changes. Expanding surface area is  
27 particularly challenging as cell plasma membrane has low elasticity and cannot be extended by more  
28 than 3% to 5% without rupture <sup>1</sup>. Despite this challenge, many studies have shown that under  
29 physiological conditions, cells can manage to expand their surface area in face of the mechanical  
30 stress and still maintain membrane integrity <sup>2-5</sup>. The ability of cells to promptly alter their surface  
31 area under mechanical stress brings several central questions: how do cells adjust surface area while  
32 rapidly changing their shape? If active processes are involved, how do they coordinate with cell  
33 shape change? What are the consequences if cells fail to adjust surface area? Because cell shape  
34 changes are one of the fundamental cellular processes underlying tissue morphogenesis, answers to  
35 these questions are essential for understanding the mechanisms of tissue construction in  
36 development.

37

38 Ventral furrow formation during *Drosophila* gastrulation provides a good model to address those  
39 questions. The morphogenetic changes of ventral furrow formation have been well documented <sup>6,7</sup>.  
40 Before ventral furrow formation, embryo undergoes a special cleavage called cellularization.  
41 Cellularization begins with a syncytium with approximately 6000 nuclei aligned at the periphery of  
42 the embryo. During cellularization, plasma membrane invaginates to form cleavage furrows between  
43 the neighboring nuclei and separate them into a monolayer of epithelial cells <sup>8</sup>. At the end of  
44 cellularization, a group of ventrally localized mesodermal precursor cells, determined by Dorsal  
45 nuclear gradient and its downstream transcription factor Twist and Snail <sup>9,10</sup>, undergo apical  
46 constriction and invaginate into a ventral furrow. Ventral furrow formation proceeds in two steps <sup>7</sup>.  
47 First, apical constriction induces a 70% increase in apical-basal cell lengthening (“lengthening

48 phase”). This is then followed by cell shortening and internalization as the tissue invaginates  
49 (“shortening phase”). The whole process lasts about twenty minutes and results in the formation of  
50 an anterior-posteriorly oriented furrow. The molecular mechanism of apical constriction has been  
51 well characterized. The expression of Twist and Snail in the mesoderm precursor cells results in the  
52 activation of the Fog-G protein coupled receptor (GPCR) pathway, which triggers the downstream  
53 RhoA/Rho1 signaling cascade. The Rho1 signaling leads to apical assembly of F-actin and activation  
54 of non-muscle myosin II (henceforth “Myosin II”), which form an actomyosin network that drives  
55 apical constriction through pulsed contractions (reviewed in <sup>11-13</sup>).

56

57 The mechanism that mediates cell lengthening during the early phase of ventral furrow formation has  
58 been recently elucidated. Quantitative analysis of 3D cell shape dynamics revealed an intimate  
59 coupling between apical constriction and cell lengthening <sup>14</sup>, which led to the proposal that  
60 gastrulating cells lengthen via a purely mechanical mechanism. The cytosol acts as an  
61 incompressible fluid, and constriction of apical actomyosin network generates forces that drive  
62 basally directed movement of the cytoplasm, resulting in cell lengthening <sup>14</sup>. In line with this view, a  
63 later study demonstrates that during apical constriction, the tissue interior behaves like a viscous  
64 continuum and undergoes a tissue-scale laminar flow, which causes apical-basal lengthening of the  
65 constricting cells <sup>15</sup>. Interestingly, during this process, the lateral membrane of the cells appears to  
66 readily expand with the flow without impeding the flow, suggesting a close coupling between cell  
67 surface expansion and the viscous movement of the cytoplasm <sup>15</sup>. This coupling is unlikely achieved  
68 through spreading of preexisting membrane folds, as previous EM studies show no obvious  
69 membrane folding prior to ventral furrow formation <sup>16-18</sup>. Thus, apical constriction-induced cell  
70 lengthening likely involves mechanisms that add new membrane material to the cell surface.

71

72 In this study, we identified Four-wheel drive (Fwd) as an important factor regulating cell surface

73 expansion during the lengthening phase of ventral furrow formation. Fwd is a *Drosophila* homologue  
74 of mammalian PI 4-kinase, PI4KIII $\beta$ . Four members of PI 4-kinases have been identified in  
75 mammals: PI4KII $\alpha$ , PI4KII $\beta$ , PI4KIII $\alpha$ , PI4KIII $\beta$ <sup>19</sup>. *Drosophila* genome encodes three PI 4-kinases  
76 corresponding to the mammalian homologues except for PI4KII $\beta$ <sup>20</sup>. PI 4-kinases catalyze the  
77 production of PI(4)P by phosphorylation of phosphatidylinositol (PtdIns)<sup>19,21</sup>. Previous studies have  
78 revealed various important roles for PI(4)P in regulating the endomembrane system. PI(4)P regulates  
79 Golgi-to-plasma membrane transport by facilitating vesicle formation from trans-Golgi-network  
80 (TGN)<sup>22,23</sup>. PI(4)P also serves as a recognition site for lipid transport protein such as OSBPs, FAPPs  
81 and CERTs, which mediate lipid transport from ER to the Golgi<sup>24</sup>. Finally, PI(4)P serves as a  
82 precursor for other important phosphoinositide species, such as PI(4,5)P<sub>2</sub><sup>25,26</sup>. Different PI 4-kinase  
83 has distinct subcellular localization and participates in different cellular processes<sup>19,21</sup>. PI4KIII $\beta$   
84 localizes to TGN, where it functions partially redundantly with PI4KII $\alpha$ , another Golgi-localized PI4  
85 kinase, in promoting antegrade trafficking from TGN<sup>19,27</sup>. In addition, PI4KIII $\beta$  itself can serve as  
86 scaffolding protein to recruit Rab11 to facilitate vesicle trafficking from TGN<sup>28–30</sup>. During  
87 *Drosophila* spermatogenesis, both kinase and scaffolding activities of Fwd have been demonstrated  
88 to facilitate vesicle trafficking that are important for successful meiotic cytokinesis<sup>31</sup>.  
89  
90 Despite the important function of PI4KIII $\beta$  in regulating Golgi-to-plasma membrane transport, null  
91 mutant flies are viable. The only reported phenotypes in *Drosophila* are cytokinesis defect during  
92 spermatogenesis and mitochondria dysfunction in neuron and muscle cells<sup>4,31–33</sup>. In this study, we  
93 uncover a previously unappreciated role of Fwd in regulating cell surface area during early  
94 embryogenesis. During ventral furrow formation, Fwd facilitates furrow invagination through its  
95 separate functions in promoting cell surface expansion and regulating apical Myosin II network  
96 organization. During cellularization, Fwd functions redundantly with PI4KII $\alpha$  to promote cleavage  
97 furrow ingression. Together, these findings demonstrated an important role for PI 4-kinases in

98 promoting cell surface expansion during epithelial morphogenesis.

## 99 **Results**

### 100 **Cell surface area increases during apical constriction-mediated cell lengthening**

101 During the lengthening phase of ventral furrow formation, cells undergoing apical constriction  
102 elongate along the apical-basal axis by a factor of  $\sim 1.7$  (Figure 1A)<sup>7</sup>. The change of cell morphology  
103 from columnar to a more slim and elongated shape predicts a significant increase in the cell surface  
104 area (Figure 1B). To test this prediction, we imaged gastrulating embryos expressing Ecadherin-GFP  
105 and segmented individual cells in 3D following a recently described protocol<sup>34</sup> (Figure 1C).  
106 Consistent with the prediction, we observed an increase in both cell length and cell surface area  
107 during apical constriction (Figure 1D, E). The average rate of cell surface area increase was 28.5  
108  $\mu\text{m}^2/\text{min}$ , which resulted in an average of  $26.0\% \pm 8.2\%$  (mean  $\pm$  s.d,  $n = 15$  cells from 3 embryos)  
109 increase of surface area within the first 8 minutes of ventral furrow formation (Figure 1D).  
110 Accordingly, the average cell length increased by  $53.0\% \pm 4.2\%$  (mean  $\pm$  s.d,  $n = 15$  cells from 3  
111 embryos) within the same time span at an average rate of  $2.6 \mu\text{m}/\text{min}$  (Figure 1E). Our measurement  
112 thus confirmed that apical constriction induced cell lengthening involves a net increase of cell  
113 surface area.

114

### 115 **Disruption of *Drosophila* PI4KIII $\beta$ homologue Fwd results in reduced rate of cell lengthening** 116 **during apical constriction**

117 Previous electron microscopy studies demonstrate that no obvious plasma membrane infoldings are  
118 present in the lateral membranes of the cellular blastoderm prior to gastrulation<sup>17,18</sup>. In addition,  
119 apical cell microvilli, which serve as a membrane reservoir for membrane ingression during  
120 cellularization, have been depleted at the end of the cellularization<sup>16-18,35</sup>. Therefore, it is unlikely  
121 that cell surface expansion during apical constriction is achieved through unfolding of pre-existing  
122 membrane folds. Given the non-stretchable nature of the plasma membrane<sup>1</sup>, we hypothesized that  
123 cell lengthening/surface area increase requires membrane supply from intracellular pool of

124 membrane. Exocytic membrane trafficking is a tempting mechanism in this process since it has been  
125 shown to promote surface area increase in many other cell shape change related processes<sup>36</sup>.

126

127 To investigate the molecular mechanism of cell surface expansion in cells undergoing apical  
128 constriction, we performed a candidate RNAi screen for genes involved in exocytic trafficking to  
129 search for mutants with defective cell lengthening during ventral furrow formation (Methods; Table  
130 1). For the majority of the candidates, we observed mild or no obvious cell lengthening defects and  
131 embryos appeared to develop normally through early gastrulation (Table 1). This might be due to  
132 either low RNAi efficiency or a non-essential function of the candidate gene during the stage of  
133 interest. A subset of candidate RNAi showed severe early defects such as lack of egg laying or  
134 abnormalities beyond cell lengthening defect (Arf1, Sec5, Rab11, dynein, PI4KIII $\alpha$ ), indicating that  
135 the target genes are essential for other developmental processes earlier than gastrulation. However,  
136 from this screen, we identified one interesting candidate, Fwd, the *Drosophila* homologue of  
137 PI4KIII $\beta$  that is important for the Golgi to plasma membrane trafficking. RNAi mediated maternal  
138 knockdown of *fwd* resulted in reduced cell lengthening during apical constriction (Figure 2A-E). In  
139 the control wildtype embryos, cell lengthening proceeded in two consecutive phases. In the first 3-4  
140 minutes of apical constriction (T = 0 indicates the onset of apical constriction, same below), cell  
141 length increased at an average speed of 1.6  $\mu\text{m}/\text{min}$  (Figure 2B-E, cyan box). At around T = 4  
142 minutes, cell lengthening speeded up and proceeded at an average speed of 2.6  $\mu\text{m}/\text{min}$  (Figure 2B-  
143 E, magenta box). In the *fwd* RNAi embryos, cell lengthening proceeded at an average speed of 1.7  
144  $\mu\text{m}/\text{min}$  during phase 1, which was comparable to the wildtype embryos. However, in phase 2, the  
145 average speed in the *fwd* RNAi embryos reduced to 1.1  $\mu\text{m}/\text{min}$  (Figure 2B-E). In addition, it took  
146 longer time for *fwd* RNAi embryos to reach the maximum cell length. In the control embryos, cell  
147 length increased from 35  $\mu\text{m}$  ( $35.4 \pm 1.5$ , mean  $\pm$  s.d.) at the onset of apical constriction to a  
148 maximum of 55  $\mu\text{m}$  ( $55.0 \pm 1.7$ , mean  $\pm$  s.d.) in approximately 10 minutes. In *fwd* RNAi embryos,



149 cell length increased from 29  $\mu\text{m}$  ( $29.3 \pm 1.1$ , mean  $\pm$  s.d.) to a maximum of 48  $\mu\text{m}$  ( $48.2 \pm 1.9$ , mean  
150  $\pm$  s.d.) in approximately 14 minutes (Figure 2C). These results demonstrate that the rate of cell  
151 lengthening during apical constriction is substantially reduced in *fwd* RNAi embryos. We observed  
152 similar cell lengthening defects in embryos derived from *fwd*<sup>3</sup>/Df females<sup>32</sup> (Figure 2A, B),  
153 suggesting that the lengthening phenotypes in the *fwd* RNAi embryos are unlikely due to off-target  
154 effect of RNAi.

155

156 We noticed that the cells in *fwd* RNAi embryos at the onset of cellularization was 17% shorter than  
157 that in the control embryos, suggesting that Fwd also plays a role in cell growth during  
158 cellularization (Figure 2C). When we lowered the expression level of *fwd* shRNA by reducing the  
159 copy number of the *GAL4* driver, the ventral cell length at the onset of apical constriction became  
160 comparable to that in the wildtype embryos, yet cell lengthening during apical constriction was still  
161 affected to a similar extent as in the original *fwd* knockdown embryos (Figure 2F-J). This result  
162 demonstrates that the cell lengthening defects in *fwd* RNAi embryos are not due to the defect in the  
163 starting cell length at the onset of gastrulation.

164

165 **Depletion of *fwd* leads to mild defects in apical constriction, but this defect cannot fully account**  
166 **for the defects in cell lengthening**

167 Previous work demonstrates that apical constriction and cell lengthening are tightly coupled<sup>14,15</sup>. It is  
168 therefore possible that the cell lengthening defects we observed in *fwd* RNAi embryos were a  
169 secondary consequence of the apical constriction defects. To test this possibility, we quantified the  
170 rate of apical constriction in control and *fwd* RNAi embryos by measuring the total length of the  
171 apical surface of the constricting cells in the 2D cross-section view (the “apical width”, red lines in  
172 Figure 3A; Methods). The decrease of apical width over time was largely comparable between  
173 wildtype and *fwd* RNAi embryos, except that the rate was slightly lower in *fwd* RNAi embryos

174 (Figure 3B, C). Thus, depletion of *Fwd* leads to a moderate but detectable reduction in the rate of  
175 apical constriction.

176

177 Next, we asked whether the difference in apical constriction rate could account for the difference in  
178 the rate of cell lengthening between wildtype and *fwd* RNAi embryos. We reasoned that if the  
179 lengthening defect in *fwd* RNAi embryos was entirely caused by the reduction in the rate of apical  
180 constriction, the relationship between apical constriction and cell lengthening should be the same as  
181 in the control embryos. To test it, we compared the extent of cell lengthening between the two  
182 genotypes when the same extent of apical constriction was achieved. In control embryos, the  
183 increase in cell length was quasi-linearly related to percent apical width reduction (Figure 3D). In  
184 *fwd* RNAi embryos, the increase in cell length upon the same level of apical constriction was  
185 consistently lower compared to the control embryos, and the difference between the two genotypes  
186 became more prominent as apical width reduction exceeds 50% (Figure 3D).

187

188 To further analyze the relationship between apical constriction and cell lengthening, we examined the  
189 rate of cell lengthening during every one-minute interval as a function of the rate of apical width  
190 reduction during the same time span. In the control embryos, there was a moderate positive  
191 correlation between the two rates ( $r^2 = 0.4$ ; Figure 3E). Knockdown of *fwd* resulted in reduced  
192 lengthening rates compared to the control at comparable constriction rates (Figure 3E). As a result,  
193 the correlation between the constriction rate and the lengthening rate became negligible for *fwd*  
194 RNAi embryos ( $r^2 = 0.1$ ; Figure 3E). In support of this observation, the ratio between cell  
195 lengthening rate and constriction rate was significantly higher in wildtype embryos compared to *fwd*  
196 RNAi embryos (Figure 3F, G). Together, these results indicate that although *fwd* knockdown had a  
197 moderate effect on the rate of apical constriction, this effect could not fully account for the reduced  
198 rate of cell lengthening in the knockdown embryos.

199

200 **The cell lengthening defect in *fwd* knockdown embryos is associated with defect in cell surface**  
201 **expansion**

202 To determine whether the cell lengthening defect in *fwd* RNAi embryos reflects defect in cell surface  
203 area increase, we performed 3D cell segmentation for the constricting cells in *fwd* RNAi embryos  
204 (Figure 4A). In support of our hypothesis, we found that depletion of Fwd indeed resulted in  
205 prominent defects in cell surface expansion during apical constriction, as indicated by a reduced rate  
206 of cell surface area increase (control: 0-8 min:  $28.5 \pm 6.7 \mu\text{m}^2/\text{min}$ ; *fwd* RNAi: 0-12 min:  $11.6 \pm 3.5$   
207  $\mu\text{m}^2/\text{min}$ ) (Figure 4B-C). As a result, the overall amount of cell surface area increase during the  
208 lengthening phase was substantially reduced in *fwd* RNAi embryos (control:  $208 \pm 65 \mu\text{m}^2$  over 8  
209 minutes; *fwd* RNAi:  $127 \pm 47 \mu\text{m}^2$  over 12 minutes) (Figure 4B-C). In addition, the increase in  
210 apical-basal cell length was also reduced in *fwd* RNAi embryos, in agreement with the 2D  
211 measurement (Figure 4D-E).

212

213 Of note, the cell length and cell surface area in *fwd* RNAi embryos were 19.0% and 14.5% smaller  
214 than the control embryos at the onset of gastrulation (Figure 4B, D; Cell length: control:  $36.1 \pm 1.5$   
215  $\mu\text{m}$ , *fwd* RNAi:  $29.2 \pm 1.1 \mu\text{m}$ ; Cell surface area: control:  $804 \pm 42 \mu\text{m}^2$ , *fwd* RNAi:  $687 \pm 46 \mu\text{m}^2$ ),  
216 consistent with the 2D measurement. In addition, the 3D analysis also confirmed the reduced rate of  
217 apical constriction in *fwd* RNAi embryos (Supplementary Figure 1A). Using a similar strategy as  
218 described above, we show that the difference in the rate of apical constriction could not fully account  
219 for the reduced rate of cell surface expansion and cell lengthening in *fwd* knockdown embryos  
220 (Figure 4F, G).

221

222 Interestingly, we noticed a difference in cell volume change between the control and *fwd* RNAi  
223 embryos. In the control embryos, there was a moderate,  $12\% \pm 11\%$  increase in cell volume within

224 the first 8 minutes of apical constriction (Supplementary Figure 1B). A small increase in cell volume  
225 during the first few minutes of apical constriction has been previously reported<sup>14</sup>. In *fwd* RNAi  
226 embryos, however, no overall volume increase was observed within the first 12 minutes of apical  
227 constriction (Supplementary Figure 1B). The cause of the cell volume phenotype in *fwd* RNAi  
228 embryos and its link with the cell surface area phenotype remain to be determined.

229

230 Together, our observations demonstrate that Fwd is required for proper cell surface area increase  
231 during the lengthening phase of ventral furrow formation. While Fwd also plays a role in promoting  
232 apical constriction, our analysis suggests that Fwd regulates cell lengthening and cell surface  
233 expansion through mechanisms that are distinct from its function in apical constriction.

234

### 235 **Fwd regulates the coordination of apical area reduction and the spatial organization of apical** 236 **Myosin II in the constricting cells**

237 The apical constriction defects observed in *fwd* RNAi embryos prompted us to examine whether Fwd  
238 also regulates cell surface area on the apical side of the cells. In addition to the mild reduction in  
239 apical constriction rate, we noticed another interesting phenotype, that the apical domain of the  
240 constricting cells appeared more uniform in *fwd* RNAi embryos compared to the control embryos. To  
241 further analyze this phenotype, we generated the flattened surface view of the embryo (Methods) and  
242 analyzed apical cell morphology at a defined stage when apical constriction reaches close to 50%  
243 (Figure 5A)<sup>37</sup>. Specifically, we focused on the distribution of apical cell area and anisotropy across  
244 the central region of the constriction domain (~6-7 cells spanning across the ventral midline, Figure  
245 5B). As expected, the average cell area was similar between the two genotypes, which validated the  
246 selection of stage for the analysis (Figure 5C). The average cell anisotropy was also similar between  
247 the control and *fwd* RNAi embryos (Figure 5D). Despite these similarities, the constricting cells in  
248 the *fwd* RNAi embryos appeared to be much more homogeneous in size and shape (Figure 5B), as

249 reflected by the significantly smaller variations in both cell area and cell anisotropy (Figure 5E, F).  
250 This difference only emerged during apical constriction. Prior to gastrulation, the prospective  
251 constricting cells appeared homogeneous in both wildtype and *fwd* RNAi embryos (Figure 5G-K).  
252  
253 Since the reduction of apical cell area during ventral furrow formation is driven by apical Myosin II  
254 contractions, we next examined whether knockdown of *fwd* led to any change in apical Myosin II  
255 organization during apical constriction. The apical activation and accumulation of Myosin II in *fwd*  
256 RNAi embryos were comparable to wildtype control (Supplementary Figure 2, T=0-6 min), but  
257 strikingly, we found that Myosin II organized into ring-like structure within the apical domain of  
258 each constricting cell, in contrast to the interconnected supracellular network appearance in wildtype  
259 embryos (Supplementary Figure 2, T=6-9 min). The mechanistic links between the myosin ring  
260 phenotype, the reduced rate of apical constriction, and the loss of heterogeneity in apical cell shape  
261 remain to be further elucidated.

262

263 **Fwd facilitates apical surface expansion in the non-constricting cells adjacent to the**  
264 **constriction domain**

265 In addition to the constricting cells, depletion of Fwd also affected cell surface expansion in the non-  
266 constricting cells outside of the constriction domain. During apical constriction in control embryos,  
267 the apical domain of the non-constricting lateral mesodermal cells adjacent to the constriction  
268 domain (“flanking cells”) was pulled by the constricting cells and became stretched along the  
269 mediolateral direction (Figure 6A, B). In the *fwd* RNAi embryos, however, the flanking cells  
270 appeared much less stretched, and this difference, albeit less obvious, can also be seen in the more  
271 laterally localized ectodermal cells (Figure 6A, A’, A’”). In line with these observations,  
272 quantification of apical cell morphology in the non-constricting cells at 50% apical constriction  
273 revealed smaller apical cell area and lower cell anisotropy in *fwd* RNAi embryos compared to the

274 controls (Figure 6B - D). This morphological difference was further confirmed as we compared the  
275 average size of the most stretched cells at each medial-lateral row of cells (Figure 6H - J). Of note,  
276 the differences in cell area and anisotropy did not exist before the onset of apical constriction (Figure  
277 6E - G). Together, these observations demonstrate that the expansion of the apical domain in the non-  
278 constricting cells, which is caused by mechanical stretching from the constriction domain, is  
279 impaired in *fwd* RNAi embryos. The distinct phenotype in the constricting and non-constricting cells  
280 raised an interesting possibility that Fwd is required for promoting cell surface expansion at both the  
281 lateral and apical cell surfaces. However, the mutant phenotype manifests differently in different cell  
282 groups, perhaps depending on how cells change their shape and where surface expansion is  
283 triggered.

284

### 285 **Fwd knockdown results in slower invagination and abnormal furrow morphology**

286 Given the important role of Fwd in regulating individual cell shape during apical constriction, we  
287 examined how Fwd knockdown would affect ventral furrow formation at the tissue scale. We found  
288 that depletion of Fwd affected furrow invagination in various aspects (Figure 7A). First, we observed  
289 a consistent difference in invagination kinetics between control and *fwd* RNAi embryos (Figure 7B).  
290 In the control embryos, invagination occurred first slowly during the first ten minutes, followed by  
291 an acceleration of invagination (Figure 7B). The slow and fast invagination phases corresponded to  
292 the lengthening and shortening phases of ventral furrow formation, respectively (Supplementary  
293 Figure 3A-B)<sup>38</sup>. In *fwd* RNAi embryos, the transition between the two invagination phases still  
294 correlated with the transition from cell lengthening to shortening, but the lengthening phase was  
295 ~46% longer compared to the control embryos (Lengthening phase duration in control:  $9.4 \pm 1.4$   
296 minutes, mean  $\pm$  s.d., N=6 embryos; lengthening phase duration in *fwd* RNAi:  $15.1 \pm 1.5$  minutes,  
297 mean  $\pm$  s.d., N=4 embryos; Supplementary Figure 3B). In addition, compared to the wild type, *fwd*  
298 RNAi embryos displayed lower rate of furrow invagination during the shortening phase and a

299 moderate reduction in the final furrow depth (Figure 7B, C).

300

301 In addition to the defects in the kinetics of furrow invagination, the furrow morphology was also  
302 altered in *fwd* RNAi embryos. The initial phase of ventral furrow formation was comparable between  
303 the control and *fwd* RNAi embryos. However, the morphology of the furrow started to deviate  
304 between control and *fwd* RNAi embryos as apical constriction progressed (Figure 7A). In both  
305 genotypes, a shallow apical indentation was generated approximately 5-7 minutes after the onset of  
306 apical constriction and quickly widened up to reach its maximal width. In wildtype embryos, the  
307 generation of this wide apical opening was followed by a rapid narrowing of the opening as the  
308 furrow folded up and invaginated. In contrast, in the *fwd* RNAi embryos, the apical indentation  
309 widened to a larger extent and stayed at the wide configuration for a prolonged time (Figure 7D,  
310 dashed box). Of note, the wider apical opening was not due to an expansion of the constriction  
311 domain, as the number of constricting cells was comparable between the two genotypes  
312 (Supplementary Figure 3C, D). The *fwd* RNAi embryos also showed morphological abnormalities at  
313 the basal side of the intermediate furrow near the end of the lengthening phase. Specifically, the  
314 basal side of the furrow was flatter in the *fwd* RNAi embryos compared to the control embryos at  
315 equivalent invagination stages (Figure 7A, T = 07:04 in the wild type and T = 14:08 in the *fwd* RNAi  
316 embryos, Figure 7E, F). Previous studies have shown that the reduction in basal myosin level is  
317 important for the cells to expand their base to facilitate furrow invagination (Polyakov et al., 2014;  
318 Krueger et al., 2018). We found that the extent of basal myosin loss was comparable between the  
319 control and *fwd* RNAi embryos despite the difference in basal curvature, indicating that the flatter  
320 base of the intermediate furrow was not caused by defects in basal myosin loss (Supplementary  
321 Figure 3E). Taken together, our results demonstrate that depletion of Fwd causes specific tissue-scale  
322 abnormalities in ventral furrow formation, including reduced efficiency of furrow invagination and  
323 altered intermediate and final furrow morphologies.

324

325 **Computer modeling suggests that restricting apical and lateral cell surface expansion may**  
326 **account for different aspects of the ventral furrow phenotype in *fwd* deficient embryos**

327 In order to understand the link between the cell surface expansion defects and the tissue-level  
328 abnormalities in *fwd* RNAi embryos, we turned to a modeling approach previously developed by  
329 Polyakov et al.<sup>38</sup> (Figure 8A; Methods). This 2D vertex model considers the cross-section view of  
330 the embryo, where a fully invaginated furrow can be achieved through a combined action of apical  
331 constriction, elastic cell cortices (“edges” in 2D) and a non-compressible cell interior. In addition, by  
332 adiabatically reducing the basal stiffness ( $K_b$ ), which mimics the gradual reduction of basal Myosin  
333 II during ventral furrow formation, the model can recapitulate different intermediate furrow  
334 morphology during the folding process<sup>38</sup> (Figure 8B<sub>1</sub>). Finally, the ectoderm in the model undergoes  
335 moderate apicobasal thinning, a process that can occur independently of ventral furrow formation in  
336 real embryos<sup>34</sup>. Despite the simplifications on the morphology and mechanical properties of the  
337 cells, the model can successfully recapitulate the stepwise changes in tissue morphology during  
338 ventral furrow formation and predict the bistable characteristic of the mesoderm<sup>34,38</sup>. This modeling  
339 framework was advantageous in testing our hypothesis since the outcomes of the model could reveal  
340 specific morphological defects at multiple stages of furrow formation. Furthermore, the properties of  
341 the apical, basal and lateral cortices could be controlled separately in the model, thereby allowing us  
342 to examine the specific impact of restricting apical or lateral surface expansion on furrow formation.

343

344 First, we tested the impact of restricting lateral membrane expansion on ventral furrow formation. To  
345 this end, we imposed a constraint on the maximal length of the lateral edges ( $l \leq l_{max}$ , Methods).  
346 Under wildtype conditions, only the cells that undergo apical constriction elongate in the apical-basal  
347 direction. Therefore, only these cells would be directly impacted by the constraints on lateral  
348 expansion (Supplementary Figure 4A, magenta box). We tested conditions where  $l_{max}$  is 1.3, 1.2 or



349 1.1 times of the original lateral length  $l_0$ . In all three cases, the impose of the constraint on lateral  
350 expansion led to a wider furrow opening and a flatter furrow base prior to the lengthening-shortening  
351 transition (Figure 8B<sub>2</sub>, red and blue arrows, respectively), which resembles the phenotype observed  
352 in *fwd* RNAi embryos. The severity of the phenotype increases as  $l_{max}$  decreases. Despite this  
353 defect, the model could still invaginate, and the final depth of the furrow was not affected (Figure  
354 8B<sub>2</sub>).

355

356 Using a similar approach, we next examined the impact of restricting apical membrane expansion on  
357 ventral furrow formation. In this case, we imposed a constraint on the maximal length of the apical  
358 edges ( $a \leq a_{max}$ ; Methods). Under wildtype conditions, the flanking cells in the model showed most  
359 prominent apical expansion, up to a factor of 2 (Supplementary Figure 4B, magenta box). In  
360 addition, the more laterally localized ectodermal cells also moderately expanded their apical domain,  
361 by a factor of  $\sim 1.3$  (Supplementary Figure 4B, green box). The expansion of the apical surface in  
362 these cells offset the loss of apical size in the constriction domain and resulted in a  $\sim 15\%$  net  
363 increase in the total apical surface size when the furrow was fully invaginated (Supplementary  
364 Figure 4C). Interestingly, the model predicted that the impact of restricting apical expansion was  
365 distinct from restricting lateral expansion. Instead of affecting the intermediate furrow morphology,  
366 restricting apical expansion mainly impacted the final invagination depth. Under conditions where  
367  $a_{max} > 1.3a_0$ , when the constraint mostly affected the flanking cells but not the ectodermal cells,  
368 furrow invagination appeared normal (Figure 8B<sub>3</sub>,  $a_{max} = 1.4a_0$ ; Supplementary Figure 4B, C).  
369 However, under conditions where  $a_{max} < 1.3a_0$ , when both the flanking cells and the ectodermal  
370 cells were affected, the final invagination depth was reduced (Figure 8B<sub>3</sub>; Supplementary Figure 4B,  
371 C). Of note, an  $a_{max}$  of  $1.25a_0$  resulted in a reduction of final invagination depth from  $60 \mu\text{m}$  to  $50$   
372  $\mu\text{m}$ , which is the level of defect observed in *fwd* RNAi embryos (Supplementary Figure 4C, green  
373 arrow).

374

375 Finally, we tested the effect of combining the restrictions on apical and lateral expansion. In this  
376 case, the simulated ventral furrow showed a combined phenotype, i.e., a wider furrow opening and  
377 flatter base at the lengthening-shortening transition and a reduced furrow depth at the end of  
378 invagination (Figure 8B<sub>4</sub>). These phenotypes qualitatively resembled the morphological defects of  
379 ventral furrow in *fwd* RNAi embryos, suggesting that the tissue-level abnormality in the mutant  
380 embryos can be attributed to defects in cell's ability to expand its surfaces. Our model also predicts  
381 that restrictions on apical and lateral surface expansion may have distinct impact on tissue-scale  
382 mechanics, which would be interesting to test in the future.

383

384 **Fwd and PI4KII $\alpha$  have partially redundant function in membrane growth during**  
385 **cellularization**

386 Given the important function of exocytic trafficking in plasma membrane expansion, we wondered  
387 whether Fwd also regulates other morphogenetic processes in early *Drosophila* embryos that require  
388 cell surface expansion. As mentioned above, depletion of Fwd resulted in a moderate reduction in  
389 apical-basal cell length at the beginning of gastrulation, which is indicative of cellularization defect.  
390 To further analyze this phenotype, we measured cell length over time during cellularization. Previous  
391 studies have shown that the ingression of cleavage furrows proceeds in separate slow and fast phases  
392 during cellularization<sup>40,41</sup>. We found that depletion of Fwd did not significantly affect the rate of  
393 furrow ingression during the slow phase, but the rate of furrow ingression during the fast phase was  
394 mildly reduced compared to the control embryos (Figure 9A, B). Note that this defect was only  
395 observed upon relatively strong depletion of Fwd (Figure 2F-H). The mild cellularization phenotype  
396 of *fwd* RNAi embryos prompted us to ask whether other PI 4-kinases share redundant function with  
397 Fwd during cellularization. Previous study has shown that another PI 4-kinase, PI4KII $\alpha$ , also  
398 displays Golgi localization in *Drosophila*<sup>20</sup>. We found that knockdown of PI4KII $\alpha$  did not result in

399 noticeable defects in cellularization (Figure 9C, D). However, when we knocked down both Fwd and  
400 PI4KII $\alpha$ , the resulting embryos became severely disrupted with no sign of cellularization (Figure  
401 9C). Reducing the expression level of shRNAs in the double knockdown condition prevented the  
402 drastic cellularization failure but resulted in substantially reduced cell length at the end of  
403 cellularization (Figure 9C, D). This dramatic additive effect suggests that Fwd and PI4KII $\alpha$  function  
404 in a largely redundant manner during cellularization.

405

406 Next, we asked whether functional redundancy between Fwd and PI4KII $\alpha$  also exists during cell  
407 lengthening in ventral furrow formation. Although PI4KII $\alpha$  single knockdown did not obviously  
408 affect cellularization, when these mutant embryos entered gastrulation, they showed similar defects  
409 in cell lengthening as in the *fwd* deficient embryos (Figure 9E-G). Interestingly, when the double  
410 knockdown embryos entered gastrulation, despite the reduced starting cell length, the rate and extent  
411 of cell lengthening were comparable to those in the *fwd* single knockdown embryos (Figure 9E-G).  
412 Taken together, our results revealed important function of Fwd and PI4KII $\alpha$  in cell surface expansion  
413 during cellularization and apical constriction-mediated cell lengthening. Interestingly, while the  
414 functions of the two enzymes are largely overlapped during cellularization, their roles in cell  
415 lengthening appear to be less redundant.

416

## 417 **Discussion**

418 In this study, we identified *Drosophila* PI4KIII $\beta$  homologue, Fwd, as an important regulator of  
419 epithelial morphogenesis in early *Drosophila* embryos. During ventral furrow formation, disruption  
420 of Fwd function resulted in a reduction in the rate of cell lengthening and cell surface area increase  
421 in cells undergoing apical constriction. Depletion of Fwd also resulted in alterations in the spatial  
422 organization of apical myosin and a moderate reduction in the rate of apical constriction, but this  
423 phenotype is separable from the defects in cell lengthening and surface expansion. In addition to the  
424 constricting cells, the non-constricting cells adjacent to the constriction domain also displayed  
425 impaired surface expansion, as revealed by a reduced stretching of their apical domain compared to  
426 the wildtype embryos. Finally, during cellularization, simultaneous disruption of Fwd and another PI  
427 4-kinase, PI4KII $\alpha$ , severely affected cell surface expansion mediated by the ingression of cleavage  
428 furrows. Together, these results provide, to the best of our knowledge, the first description of the role  
429 of PI 4-kinases in promoting cell surface expansion and cell shape change during epithelial  
430 morphogenesis. Using computer modeling, we further demonstrated that restricting apical and lateral  
431 surface expansion can lead to specific defects in ventral furrow morphology that closely resemble the  
432 phenotypes observed in *fwd* deficient embryos. These findings point to a potential mechanistic link  
433 between cell surface “expandability” and tissue-scale mechanics during epithelial folding.

434

435 Previous studies have shown that Fwd plays an important role in meiotic cytokinesis during  
436 spermatogenesis<sup>31,32,42</sup>. In *fwd* mutant males, contractile rings can still form and constrict in dividing  
437 spermatocytes, but cleavage furrows are unstable and later retract. Fwd is known to regulate the  
438 Golgi to plasma membrane trafficking, and similar cytokinesis defects have also been observed in  
439 mutants of other Golgi associated proteins<sup>31,42-44</sup>. These observations suggest that the spermatocyte  
440 cytokinesis defects in *fwd* mutant are caused by defects in membrane trafficking. In this work, we  
441 showed that Fwd also contributes to membrane growth during cellularization, an atypical cytokinesis

442 process, although in this case Fwd functions in a largely redundant manner with PI4KII $\alpha$ . Given the  
443 observation that *fwd* mutants do not show obvious defects in regular mitotic cytokinesis<sup>32</sup>, an  
444 interesting future investigation is to determine the relative contribution of Golgi-localized PI 4-  
445 kinases in different types of cytokinesis processes.

446

447 While numerous studies have shown the important role of exocytosis in membrane growth during  
448 cytokinesis, including cellularization<sup>45,46</sup>, the role of exocytic trafficking in cell membrane  
449 expansion in support of rapid cell shape change during epithelial remodeling is less well understood.  
450 We show that during ventral furrow formation, apical constriction-mediated cell lengthening  
451 involves a prompt increase in the cell surface area. Our identification of Fwd, a PI4 kinase important  
452 for Golgi-PM trafficking, as a regulator of cell lengthening further suggests that the observed cell  
453 surface expansion involves active exocytic membrane insertion. Future experiments directly  
454 monitoring new membrane addition during ventral furrow formation would be important to further  
455 test this hypothesis.

456

457 So far, the only reported *fwd* phenotypes associated with surface area regulation are spermatocyte  
458 cytokinesis defects initially discovered by Brill et al<sup>32</sup> and the cellularization and gastrulation  
459 defects described in this study. A common characteristic shared between these processes is that all of  
460 them involve rapid membrane expansion, which likely imposes a high demand on intracellular  
461 membrane supply. In spermatocytes, meiotic divisions occur in rapid succession, causing about 60%  
462 increase in surface area in less than two hours<sup>31</sup>. Likewise, during cellularization, the cells increase  
463 their surface area 25 fold in about one hour<sup>40,47</sup>. During apical constriction-mediated cell  
464 lengthening, the cell surface area increases by ~25% in about eight minutes. These observations raise  
465 the hypothesis that the function of Fwd becomes more important when there is an acute demand for  
466 membrane supply. An interesting future question is whether the activity of Fwd is subjected to

467 regulation by the elevated demand on intracellular membrane supply and, if so, how does the cell  
468 sense such demand. Another important future question is how Fwd executes its function to facilitate  
469 cell surface expansion during cellularization and cell lengthening. Two modes of PI4KIII $\beta$  function  
470 have been discovered in animal cells, both of which can promote exocytic membrane insertion.  
471 PI4KIII $\beta$  can serve as a docking site to recruit Rab11 to TGN through direct protein-protein  
472 interaction, which has been observed both in vitro and in vivo<sup>28,30</sup>. Alternatively, PI4KIII $\beta$  catalyzes  
473 the production of PI(4)P lipids at TGN. PI(4)P helps to recruit various proteins important for  
474 trafficking and can also indirectly impact trafficking through affecting other pools of membrane lipid  
475 species<sup>22–26</sup>. Understanding the mode of action will be a key step to uncover the relevant  
476 downstream molecular network regulating cell surface area during epithelial remodeling.  
477  
478 Our work also shed light on the impact of restricting cell surface expansion on tissue-level  
479 remodeling during morphogenesis. During ventral furrow formation, disrupting the function of Fwd  
480 resulted in prolonged lengthening phase, aberrant intermediate furrow morphology prior to  
481 invagination, slower furrow invagination and shallower furrow at the end of invagination. While a  
482 complete understanding of the cause of these phenotypes and their potential connections awaits  
483 further investigation, our modeling analysis suggests that certain key aspects of the tissue-level  
484 morphological abnormality in the mutant embryos can be attributed to defects in cell surface  
485 expansion. It is important to note that in *fwd* deficient embryos, cell surface expansion is attenuated,  
486 but not completely inhibited, which may explain the relatively moderate phenotype on ventral furrow  
487 formation. Future investigations with novel approaches that allow acute and more complete block of  
488 cell membrane expansion will offer a further test on this point. In addition, new modeling approaches  
489 that contain the temporal components, which is lacking in our current modeling framework, will help  
490 us to start to understand how restricting cell surface expansion might contribute to the defects in  
491 tissue folding kinetics observed in *fwd* deficient embryos.

## 492 **Materials and methods**

### 493 **Fly stocks and genetics**

494 *Drosophila melanogaster* flies were grown and maintained at 18°C and crosses were maintained at  
495 room temperature (21 – 23 °C). All flies were raised on standard fly food. For embryo collection,  
496 flies with corresponding genotype were used to set up cages and maintained at 18°C, and embryos  
497 were collected from apple juice agar plate containing fresh yeast paste.

498

499 The UAS-shRNA lines targeting *fwd* (TRiP *fwd*, BDSC stock#35257) and *PI4KIIα* (TRiP *PI4KIIα*,  
500 BDSC stock#65110) were obtained from Bloomington Drosophila Stock Center. A TRiP *PI4KII*;  
501 TRiP *fwd* stock were generated from cross for the double RNAi experiments. The *fwd*<sup>3</sup> mutant stock  
502 (*fwd*<sup>3</sup>/TM6) was a gift from Julie Brill and have been described previously (Brill et al., 2000;  
503 Polevoy et al.,2009). *fwd*<sup>3</sup>/TM6 flies were crossed to flies from a deficiency line covering the *fwd*  
504 gene locus (Df(3L)Exel9057/TM6B, BDSC stock#7920) to generate loss of function *fwd* mutant.

505

506 The candidate RNAi and dominant negative lines used for the screen for lengthening defects and the  
507 phenotypes in ventral furrow formation was listed in Table 1. The genes included exocytic trafficking  
508 related small GTPases and their regulators and/or effectors (Rab4, Rab8, Rab11, Arf1, Sec71, Garz,  
509 Nuf, Crag, Brun, Gga), motor proteins (dynein, Myosin V), lipid regulators (Cert, PI4KIIα, PI4KIIIα,  
510 Fwd, Sac1) and components of exocyst complex (Sec5). For some small GTPases, the impact of  
511 expression of dominant negative form of the protein was also examined<sup>48,49</sup>.

512

513 For RNAi-mediated knockdown, female flies from RNAi lines were crossed to male flies from  
514 GAL4 driver lines, and embryos from F1 flies were collected for imaging. GAL4 driver lines  
515 carrying *matα4*-GAL-VP16 (denoted as “mat67” on the 2nd chromosome and “mat15” on the 3rd  
516 chromosome) were used to drive maternal expression of shRNA in the embryo<sup>50</sup>. For control

517 experiment, wildtype female Oregon R flies were crossed to the GAL4 driver lines. For examining  
518 the cellularization and lengthening defects, the driver line stock *mat67 Sqh::mCherry; mat15*  
519 *Ecad::GFP* was used for knockdown experiments with 2 copies of GAL4, and the driver line stock  
520 *Sp/Cyo; mat15 Ecad::GFP* was used for knockdown experiments with single copy of GAL4. Unless  
521 otherwise specified, all the knockdown experiments are performed with 2 copies of GAL4.

522

523 To examine myosin in *fwd* RNAi background, female flies from Oregon R (control) and TRiP *fwd*  
524 stock were crossed to male flies containing *Sqh::mCherry* and 2 copies of maternal GAL4 drivers.  
525 Embryos from F1 flies were collected for imaging.

526

### 527 **Live imaging**

528 Embryos were dechorionated in 40% bleach (~3% Sodium Hydrochloride), rinsed with water 12  
529 times and mounted in water with the ventral side facing up in a 35 mm MatTek glass-bottom dish  
530 (MatTek Corporation). All live imaging was conducted on an upright Olympus FV-MPERS  
531 multiphoton microscope equipped with the InSight Deepsee Laser System, an Olympus 25×/1.05  
532 water dipping objective (XLPLN25×WMP2) and Fluoview software. 920 nm laser was used to  
533 excite GFP/YFP. Unless otherwise mentioned, a 512 × 512 pixel (pixel size: 0.331 μm/pixel) of  
534 region of interest was imaged using resonant scanner with frame average of 16 times. Embryos were  
535 imaged from the ventral surface to 80 μm below surface with a Z step size of 1 μm and temporal  
536 resolution of 53 sec/frame. For movies used for 3D reconstruction, in order to gain higher signal-to-  
537 noise ratio, a 300×150pixel (pixel size: 0.331 μm/pixel) of region of interest were imaged using  
538 galvanometer scanner with frame average of 4 times. The depth and step size in Z was the same  
539 while the temporal resolution was set as 2 min/frame to minimize photobleaching.

540

### 541 **Image processing and analysis**



542 All images were processed using ImageJ (NIH) and MATLAB (MathWorks). Embryos were aligned  
543 based on the onset of gastrulation when ventral mesodermal precursor cells start to constrict apically.  
544 E-cadherin-GFP was imaged as a membrane marker for all image analyses described below.

545

#### 546 2D analysis of cell lengthening (cross-section view)

547 For analysis of the rate of cell lengthening during apical constriction, an average projection of 20  
548 slices of cross-section images was first generated, and the apical-basal height of the cell located at  
549 the ventral midline was measured in ImageJ. For analysis of the rate of apical constriction, a row of  
550 ~10 cells in mediolateral direction centered around ventral midline was selected from the en face  
551 view images and tracked over time. For each time point, the farthest left and right boundary points at  
552 the most apical side of this row of cells were determined and mapped onto the cross-section view  
553 images. Then, the length of the apical curve between the left and right boundary points was measured  
554 from the cross-section view using segmented line tool in ImageJ. To calculate the constriction rate  
555 and lengthening rate, the apical domain width over time plot and cell length over time plot were first  
556 smoothed and interpolated (from 2-min interval to 1-min interval), and the derivative of the resulting  
557 curves were computed to determine the rate of change.

558

#### 559 3D analysis of cell lengthening

560 3D segmentation and quantification of individual cells were performed as previously described <sup>34</sup>.  
561 Individual cells near the ventral midline were manually tracked over the course of ventral furrow  
562 formation and segmented using the Carving tool of the “Ilastik” program <sup>51</sup>. For each timepoint, a Z-  
563 stack of images covering the entire depth of the ventral tissue was used as the input. Manual  
564 corrections were performed for the apical and basal most regions of the cells, where the automatic  
565 segmentation by Ilastik was usually not optimal. Manual corrections were carried out by manually  
566 outlining the cell at the relevant Z-planes using the multi-point tool in ImageJ. The resulting

567 measurements were then incorporated into the automatic segmentation using a custom MATLAB  
568 script to create the final 3D rendering of the cell. Three control embryos and three  *fwd*  RNAi  
569 embryos were analyzed. For each embryo, 3 – 6 cells were segmented over the course of the  
570 lengthening phase at 2-minute intervals.

571

572 A custom MATLAB script was used to process the reconstructed cells and analyze the cells' surface  
573 area, volume, cell length along the apical-basal axis, and apical area. Surface area and volume were  
574 measured using the “surfaceArea” and the “volume” functions in MATLAB, respectively. To  
575 measure the apical-basal cell length and apical area, the 3D cell mask was rotated so that the cell  
576 apical-basal axis became vertical. This was followed by regenerating the Z stack of 2D slices. The  
577 cell length was calculated by summing up the distances between the centroids of cell slices at  
578 neighboring Z-planes except for the apical-most (3  $\mu\text{m}$ ) and basal-most (3  $\mu\text{m}$ ) regions, where the  
579 distances were determined by directly measuring the vertical height to avoid measurement errors due  
580 to irregular shapes in these regions. The apical area was determined by measuring the average area of  
581 the apical slices, ranging from 1 – 2  $\mu\text{m}$  from the apical surface of the rotated cell mask.

582

### 583 *Analysis of apical shape and area change (surface view)*

584 For quantification of the apical cell shape, the image stack was first corrected for any tilting in the  
585 mediolateral axis using ImageJ such that the ventral midline was positioned near the center of the  
586 image. Next, a custom MATLAB script was used to generate a flattened surface view of the embryo  
587 that accounted for the curvature of the embryo. Next, individual cell was segmented from the surface  
588 view (2D) using Cellpose, a deep learning-based segmentation software<sup>37</sup>. A custom MATLAB  
589 script was then used to extract and calculate relevant parameters such as cell position, apical area and  
590 apical anisotropy. To identify the most-stretched cells from the surface view, a set of evenly spaced  
591 mediolateral sampling lines were generated, and among cells falling on each sampling line, cells

592 with maximal area on left and right side of the ventral midline were identified as the most stretched  
593 cells.

594

### 595 **Energy minimization-based 2D vertex model for ventral furrow formation**

596 The energy minimization-based 2D vertex model for ventral furrow formation was constructed as  
597 previously described<sup>34,38</sup>. The model considers the cross-section view of the embryo, which contains  
598 a ring of 80 columnar-shaped cells that resembles the number and geometry of the primary  
599 embryonic epithelium formed during cellularization. The morphology of the cells is maintained by  
600 the following mechanisms. First, the apical, basal and lateral membranes of the cells resist stretching  
601 or compressing like elastic springs. Second, the cells resist changes in cell volume (area in the 2D  
602 model). The model is driven out of the initial energy equilibrium by exerting the following two  
603 “active” forces. First, the apex of the cells in the ventral region of the model embryo has a propensity  
604 to shrink, which resembles apical constriction. Second, the apical-basal length of the ectodermal  
605 cells in the model embryo has a propensity to reduce, which resembles ectodermal shortening  
606 process observed in real embryos during gastrulation. Upon application of these active forces, the  
607 model transitions through a series of intermediate equilibrium states by adiabatically reducing basal  
608 spring stiffness, which recapitulates basal myosin loss during ventral furrow formation. These  
609 intermediate equilibrium states resemble the intermediate furrow morphology observed during the  
610 lengthening-shortening transition in the real embryo.

611

612 The energy equation that describes the mechanical properties of the model is given by the following  
613 expression:

$$E = \sum_i \varphi_i \mu_i a_i^2 + \sum_i [K_l(l_i - l_0)^2 + K_b(b_i - b_0)^2 + K_a(a_i - a_0)^2] + \sum_i C_{VOL}(V_i) + C_{YOLK}(V_{yolk})$$

614  
615  
616 The first term in the equation describes the active apical forces that mediate apical constriction. The  
617 term  $\varphi_i \mu_i$  sets up the spatial distribution of apical contractility.  $\varphi_i$  equals to 1 for mesoderm cells (18  
618 cells, with 9 cells flanking each side of the ventral midline) and 0 for the cells outside of the  
619 mesoderm domain (“ectodermal cells”).  $\mu_i$  is a Gaussian function that centers at the ventral midline.  
620 Specifically,

$$\mu_i = \mu_0 e^{\frac{-(i-i_{mid})^2}{2\sigma^2}}$$

621  
622 Here  $i_{mid}$  is the cell ID at the ventral midline,  $\mu_0$  sets up the strength of apical constriction and  $\sigma$  sets  
623 up the width of the Gaussian function. Of note, the Gaussian function of apical force distribution in  
624 the mesoderm domain is set in such a way that only 12 cells at the ventral most region of the embryo  
625 will undergo apical constriction, mimicking the situation in real embryos.

626  
627 The second term in the equation describes the elastic resistance of the membrane springs.  $a_i$ ,  $b_i$ , and  
628  $l_i$  are the length of the apical, basal and lateral springs of cell  $i$ , respectively. The resting length of  
629 these springs,  $a_0$ ,  $b_0$ , and  $l_0$ , respectively, are set to be equal to the initial length of the springs. The  
630 spring constant of the apical, basal and lateral springs are given by  $k_a$ ,  $k_b$  and  $k_l$ , respectively. Note  
631 that in order to drive apical-basal shortening of the ectoderm in the model, the resting length of the  
632 lateral springs ( $l_0$ ) of the cells outside of the mesoderm domain is set to be 80% of their original  
633 length, as described previously<sup>34</sup>.

634

635 The last two terms,  $C_{VOL}$  and  $C_{YOLK}$ , describe the constraint due to volume (“area” in 2D)  
636 conservation of the cells and the yolk, respectively. When the volume deviates from the resting  
637 value, penalties are imposed as described by the following equations:

$$638 \quad C_{VOL}(V_i) = K_v(V_i - V_0)^2$$

$$639 \quad C_{YOLK}(V_{yolk}) = K_Y(V_{yolk} - V_{0,yolk})^2$$

640 Here,  $V_i$  is the volume of cell  $i$ .  $V_0$  is the initial equilibrium volume of cell  $i$ . Similarly,  $V_{yolk}$  is the  
641 volume of the yolk.  $V_{0,yolk}$  is the initial equilibrium volume of the yolk.  $K_v$  and  $K_{yolk}$  set the degree  
642 of the penalty when the cell volume and the yolk volume deviate from the initial equilibrium values,  
643 respectively.

644

645 The following approach is used to implement the constraint on lateral membrane expansion. When  
646 the lateral spring reaches a certain threshold  $l_{max}$ , a strong penalty is implemented for any further  
647 stretching of the spring. The penalty is defined as:

$$648 \quad E_{penaltyL} = K_{pl}(l_i - l_{max})^2, \text{ when } l_i > l_{max}$$

649 In the simulation, the following thresholds have been tested:  $1.3l_0$ ,  $1.2l_0$ , and  $1.1l_0$ .  $K_{pl}$  is set as a  
650 constant of 100,000. Note that although all cells in the model are subjected to this constraint, the  
651 constraint only affected the apically constricting cells due to the way how cells change their apical-  
652 basal length during ventral furrow formation.

653

654 The constraint on apical membrane expansion is implemented in a similar manner. The penalty for  
655 exceeding the threshold apical spring size,  $a_{max}$ , is given by:

656 
$$E_{penaltyA} = K_{pa}(a_i - a_{max})^2, \text{ when } a_i > a_{max}$$

657 The thresholds for apical spring length tested in the simulation are  $1.3a_0$ ,  $1.2a_0$ , and  $1.1a_0$ .  $K_{pa}$  is

658 set as a constant of 100,000.

659

660 List of parameters used in the simulation:

| <i>Parameter</i> | <i>Value</i>             |
|------------------|--------------------------|
| $K_a$            | 30                       |
| $K_l$            | 20                       |
| $K_b^*$          | $2^{11} \rightarrow 2^0$ |
| $\mu_0$          | 2000                     |
| $\sigma$         | 3                        |
| $K_v$            | 5000                     |
| $K_Y$            | 1                        |

661

662 \*: In the simulation,  $K_b$  decreases adiabatically from  $2^{11}$  to  $2^0$ , with a step size of 2-fold reduction.

663 Accordingly, the model transition through a series of energy-minimum equilibrium state defined by

664 each value of  $K_b$ . These equilibrium states represent the intermediate and final furrow morphology.

665

### 666 **Statistics**

667 Statistical comparisons were performed using two-tailed Student's t tests after Shapiro-Wilk

668 normality test. Sample sizes can be found in the figure legends.

669

670 **Data availability**

671 The original data generated in this work are available upon request.

672

673 **Code availability**

674 All computer codes used in this study are available upon request.

675

676 **Acknowledgments:**

677 We thank members of the He lab and the Griffin lab for discussions throughout this work; Yashi  
678 Ahmed and Charles K.Barlowe for valuable suggestions on this project; Ann Lavanway and Zednek  
679 Svindrych for technical support with imaging. We thank the Brill lab for sharing reagents. We thank  
680 the Bloomington *Drosophila* Stock Center (NIH P40OD018537) for fly stocks. This study was  
681 supported by NIGMS ESI-MIRA R35GM128745 and American Cancer Society Institutional  
682 Research Grant #IRG –82-003-33 to B.H. The study used core services supported by STANTO15R0  
683 (CFF RDP), P30-DK117469 (NIDDK P30/DartCF), and P20-GM113132 (bioMT COBRE).

684

685 **Author Contributions:**

686 W.C. and B.H. designed the study. W.C. performed the experiments. W.C., V.B and B.H. analyzed  
687 the data. W.C. wrote the first draft of the manuscript. All authors contributed to the final version of  
688 the manuscript.

689

690 **Declaration of Interests:**

691 The authors declare no competing interests.

692

## 693 **References**

- 694 1. Morris, C. E. & Homann, U. Cell surface area regulation and membrane tension. *J. Membr. Biol.*  
695 **179**, 79–102 (2001).
- 696 2. Truschel, S. T. *et al.* Stretch-regulated exocytosis/endocytosis in bladder umbrella cells. *Mol.*  
697 *Biol. Cell* **13**, 830–846 (2002).
- 698 3. Aguet, F. *et al.* Membrane dynamics of dividing cells imaged by lattice light-sheet microscopy.  
699 *Mol. Biol. Cell* **27**, 3418–3435 (2016).
- 700 4. Giansanti, M. G. *et al.* Exocyst-Dependent Membrane Addition Is Required for Anaphase Cell  
701 Elongation and Cytokinesis in *Drosophila*. *PLoS Genet.* **11**, e1005632 (2015).
- 702 5. Tanaka, M., Fujimoto, K. & Yumura, S. Regulation of the Total Cell Surface Area in Dividing  
703 *Dictyostelium* Cells. *Front. Cell Dev. Biol.* **8**, 238 (2020).
- 704 6. Leptin, M. & Grunewald, B. Cell shape changes during gastrulation in *Drosophila*. *Development*  
705 **110**, 73–84 (1990).
- 706 7. Sweeton, D., Parks, S., Costa, M. & Wieschaus, E. Gastrulation in *Drosophila*: the formation of  
707 the ventral furrow and posterior midgut invaginations. *Development* **112**, 775–89 (1991).
- 708 8. Mazumdar, A. & Mazumdar, M. How one becomes many: blastoderm cellularization in  
709 *Drosophila melanogaster*. *Bioessays* **24**, 1012–22 (2002).
- 710 9. Leptin, M. twist and snail as positive and negative regulators during *Drosophila* mesoderm  
711 development. *Genes Dev* **5**, 1568–76 (1991).
- 712 10. Roth, S., Stein, D. & Nüsslein-Volhard, C. A gradient of nuclear localization of the dorsal protein  
713 determines dorsoventral pattern in the *Drosophila* embryo. *Cell* **59**, 1189–1202 (1989).
- 714 11. Gheisari, E., Aakhte, M. & Müller, H.-A. J. Gastrulation in *Drosophila melanogaster*: Genetic  
715 control, cellular basis and biomechanics. *Mech. Dev.* **163**, 103629 (2020).
- 716 12. Gilmour, D., Rembold, M. & Leptin, M. From morphogen to morphogenesis and back. *Nature*  
717 **541**, 311–320 (2017).



- 718 13. Martin, A. C. The Physical Mechanisms of *Drosophila* Gastrulation: Mesoderm and Endoderm  
719 Invagination. *Genetics* **214**, 543–560 (2020).
- 720 14. Gelbart, M. A. *et al.* Volume conservation principle involved in cell lengthening and nucleus  
721 movement during tissue morphogenesis. *Proc Natl Acad Sci U A* **109**, 19298–303 (2012).
- 722 15. He, B., Doubrovinski, K., Polyakov, O. & Wieschaus, E. Apical constriction drives tissue-scale  
723 hydrodynamic flow to mediate cell elongation. *Nature* **508**, 392–6 (2014).
- 724 16. Figard, L., Xu, H., Garcia, H. G., Golding, I. & Sokac, A. M. The plasma membrane flattens out  
725 to fuel cell-surface growth during *Drosophila* cellularization. *Dev. Cell* **27**, 648–655 (2013).
- 726 17. Rickoll, W. L. Cytoplasmic continuity between embryonic cells and the primitive yolk sac during  
727 early gastrulation in *Drosophila melanogaster*. *Dev. Biol.* **49**, 304–310 (1976).
- 728 18. Turner, F. R. & Mahowald, A. P. Scanning electron microscopy of *Drosophila melanogaster*  
729 embryogenesis. II. Gastrulation and segmentation. *Dev. Biol.* **57**, 403–416 (1977).
- 730 19. Balla, A. & Balla, T. Phosphatidylinositol 4-kinases: old enzymes with emerging functions.  
731 *Trends Cell Biol.* **16**, 351–361 (2006).
- 732 20. Burgess, J. *et al.* Type II phosphatidylinositol 4-kinase regulates trafficking of secretory granule  
733 proteins in *Drosophila*. *Dev. Camb. Engl.* **139**, 3040–3050 (2012).
- 734 21. Waugh, M. G. The Great Escape: how phosphatidylinositol 4-kinases and PI4P promote vesicle  
735 exit from the Golgi (and drive cancer). *Biochem. J.* **476**, 2321–2346 (2019).
- 736 22. Cruz-Garcia, D. *et al.* Recruitment of arfaptins to the trans-Golgi network by PI(4)P and their  
737 involvement in cargo export. *EMBO J.* **32**, 1717–1729 (2013).
- 738 23. Rahajeng, J. *et al.* Efficient Golgi Forward Trafficking Requires GOLPH3-Driven, PI4P-  
739 Dependent Membrane Curvature. *Dev. Cell* **50**, 573-585.e5 (2019).
- 740 24. Mesmin, B., Kovacs, D. & D'Angelo, G. Lipid exchange and signaling at ER-Golgi contact  
741 sites. *Curr. Opin. Cell Biol.* **57**, 8–15 (2019).
- 742 25. Dickson, E. J., Jensen, J. B. & Hille, B. Golgi and plasma membrane pools of PI(4)P contribute

- 743 to plasma membrane PI(4,5)P2 and maintenance of KCNQ2/3 ion channel current. *Proc. Natl.*  
744 *Acad. Sci. U. S. A.* **111**, E2281-2290 (2014).
- 745 26. Thapa, N. *et al.* Phosphoinositide signaling regulates the exocyst complex and polarized integrin  
746 trafficking in directionally migrating cells. *Dev. Cell* **22**, 116–130 (2012).
- 747 27. Minogue, S. The Many Roles of Type II Phosphatidylinositol 4-Kinases in Membrane  
748 Trafficking: New Tricks for Old Dogs. *BioEssays News Rev. Mol. Cell. Dev. Biol.* **40**, (2018).
- 749 28. Burke, J. E. *et al.* Structures of PI4KIII $\beta$  complexes show simultaneous recruitment of Rab11  
750 and its effectors. *Science* **344**, 1035–1038 (2014).
- 751 29. Chalupska, D. *et al.* Phosphatidylinositol 4-kinase III $\beta$  (PI4KB) forms highly flexible  
752 heterocomplexes that include ACBD3, 14-3-3, and Rab11 proteins. *Sci. Rep.* **9**, 567 (2019).
- 753 30. de Graaf, P. *et al.* Phosphatidylinositol 4-kinasebeta is critical for functional association of rab11  
754 with the Golgi complex. *Mol. Biol. Cell* **15**, 2038–2047 (2004).
- 755 31. Polevoy, G. *et al.* Dual roles for the Drosophila PI 4-kinase four wheel drive in localizing Rab11  
756 during cytokinesis. *J. Cell Biol.* **187**, 847–858 (2009).
- 757 32. Brill, J. A., Hime, G. R., Scharer-Schuksz, M. & Fuller, M. T. A phospholipid kinase regulates  
758 actin organization and intercellular bridge formation during germline cytokinesis. *Dev. Camb.*  
759 *Engl.* **127**, 3855–3864 (2000).
- 760 33. Terriente-Felix, A., Wilson, E. L. & Whitworth, A. J. Drosophila phosphatidylinositol-4 kinase  
761 fwd promotes mitochondrial fission and can suppress Pink1/parkin phenotypes. *PLoS Genet.* **16**,  
762 e1008844 (2020).
- 763 34. Guo, H., Swan, M. & He, B. Optogenetic inhibition of actomyosin reveals mechanical bistability  
764 of the mesoderm epithelium during Drosophila mesoderm invagination. *eLife* **11**, e69082 (2022).
- 765 35. Figard, L. & Sokac, A. M. A membrane reservoir at the cell surface: unfolding the plasma  
766 membrane to fuel cell shape change. *Bioarchitecture* **4**, 39–46 (2014).
- 767 36. He, B. & Guo, W. The exocyst complex in polarized exocytosis. *Curr. Opin. Cell Biol.* **21**, 537–

- 768 542 (2009).
- 769 37. Stringer, C., Wang, T., Michaelos, M. & Pachitariu, M. Cellpose: a generalist algorithm for  
770 cellular segmentation. *Nat. Methods* **18**, 100–106 (2021).
- 771 38. Polyakov, O. *et al.* Passive mechanical forces control cell-shape change during *Drosophila*  
772 ventral furrow formation. *Biophys J* **107**, 998–1010 (2014).
- 773 39. Krueger, D., Tardivo, P., Nguyen, C. & De Renzis, S. Downregulation of basal myosin-II is  
774 required for cell shape changes and tissue invagination. *EMBO J.* **37**, (2018).
- 775 40. Lecuit, T. & Wieschaus, E. Polarized Insertion of New Membrane from a Cytoplasmic Reservoir  
776 during Cleavage of the *Drosophila* Embryo. *J. Cell Biol.* **150**, 849–860 (2000).
- 777 41. Mahowald, A. P. Electron microscopy of the formation of the cellular blastoderm in *Drosophila*  
778 *melanogaster*. *Exp. Cell Res.* **32**, 457–468 (1963).
- 779 42. Giansanti, M. G., Belloni, G. & Gatti, M. Rab11 is required for membrane trafficking and  
780 actomyosin ring constriction in meiotic cytokinesis of *Drosophila* males. *Mol. Biol. Cell* **18**,  
781 5034–5047 (2007).
- 782 43. Farkas, R. M., Giansanti, M. G., Gatti, M. & Fuller, M. T. The *Drosophila* Cog5 homologue is  
783 required for cytokinesis, cell elongation, and assembly of specialized Golgi architecture during  
784 spermatogenesis. *Mol. Biol. Cell* **14**, 190–200 (2003).
- 785 44. Xu, H. *et al.* Syntaxin 5 is required for cytokinesis and spermatid differentiation in *Drosophila*.  
786 *Dev. Biol.* **251**, 294–306 (2002).
- 787 45. Schiel, J. A. & Prekeris, R. Membrane dynamics during cytokinesis. *Curr. Opin. Cell Biol.* **25**,  
788 92–98 (2013).
- 789 46. Sokac, A. M., Biel, N. & De Renzis, S. Membrane-actin interactions in morphogenesis: Lessons  
790 learned from *Drosophila* cellularization. *Semin. Cell Dev. Biol.* S1084-9521(22)00101-X (2022)  
791 doi:10.1016/j.semcdb.2022.03.028.
- 792 47. Mazumdar, A. & Mazumdar, M. How one becomes many: Blastoderm cellularization in

- 793 *Drosophila melanogaster*. *BioEssays* **24**, 1012–1022 (2002).
- 794 48. Feig, L. A. Tools of the trade: use of dominant-inhibitory mutants of Ras-family GTPases. *Nat.*  
795 *Cell Biol.* **1**, E25–E27 (1999).
- 796 49. Zhang, J. *et al.* Thirty-One Flavors of *Drosophila* Rab Proteins. *Genetics* **176**, 1307–1322  
797 (2007).
- 798 50. Hunter, C. & Wieschaus, E. Regulated expression of *nullo* is required for the formation of  
799 distinct apical and basal adherens junctions in the *Drosophila* blastoderm. *J Cell Biol* **150**, 391–  
800 401 (2000).
- 801 51. Berg, S. *et al.* ilastik: interactive machine learning for (bio)image analysis. *Nat. Methods* **16**,  
802 1226–1232 (2019).
- 803

804 **Table 1: Candidate RNAi and dominant negative lines used for the screen for lengthening**  
 805 **defects and the phenotypes in ventral furrow formation**

| <b>Gene</b>      | <b>Inhibition method</b> | <b>Bloomington Stock Number</b> | <b>Ventral furrow formation phenotype</b>       |
|------------------|--------------------------|---------------------------------|-------------------------------------------------|
| Rab4             | RNAi                     | BL33757                         | Normal                                          |
| Rab8             | dominant negative        | BL9780                          | Abnormal cell shape                             |
| Rab11            | dominant negative        | BL9792                          | No egg laying                                   |
| Arf1             | RNAi                     | BL66174, BL66175                | Mild lengthening defect and abnormal cell shape |
| Sec71            | RNAi                     | BL50539                         | Normal                                          |
| Garz             | RNAi                     | BL34987                         | Mild lengthening defect                         |
| Nuf              | RNAi                     | BL44035                         | Normal                                          |
| Crag             | RNAi                     | BL53261                         | Normal                                          |
| Brun             | RNAi                     | BL64934                         | Normal                                          |
| Gga              | RNAi                     | BL36905, BL51170                | Normal                                          |
| dynein           | RNAi                     | BL36698                         | No egg laying                                   |
| dynein           | RNAi                     | BL36583                         | Mild lengthening defects                        |
| MyosinV          | RNAi                     | BL55174                         | Normal                                          |
| Cert             | RNAi                     | BL35579, BL60080                | Mild lengthening defect                         |
| PI4KII $\alpha$  | RNAi                     | BL35278, BL65110                | Mild lengthening defects                        |
| PI4KIII $\alpha$ | RNAi                     | BL35643                         | No egg laying                                   |
| Fwd              | RNAi                     | BL35257                         | Lengthening defects                             |
| Sac1             | RNAi                     | BL56013                         | Normal                                          |
| Sec5             | RNAi                     | BL50556                         | Mild lengthening defect and abnormal cell shape |

806

807 Note: Phenotypes were assessed based on visual inspection.

808 **Figures and Figure Legends**

809 **Figure 1**

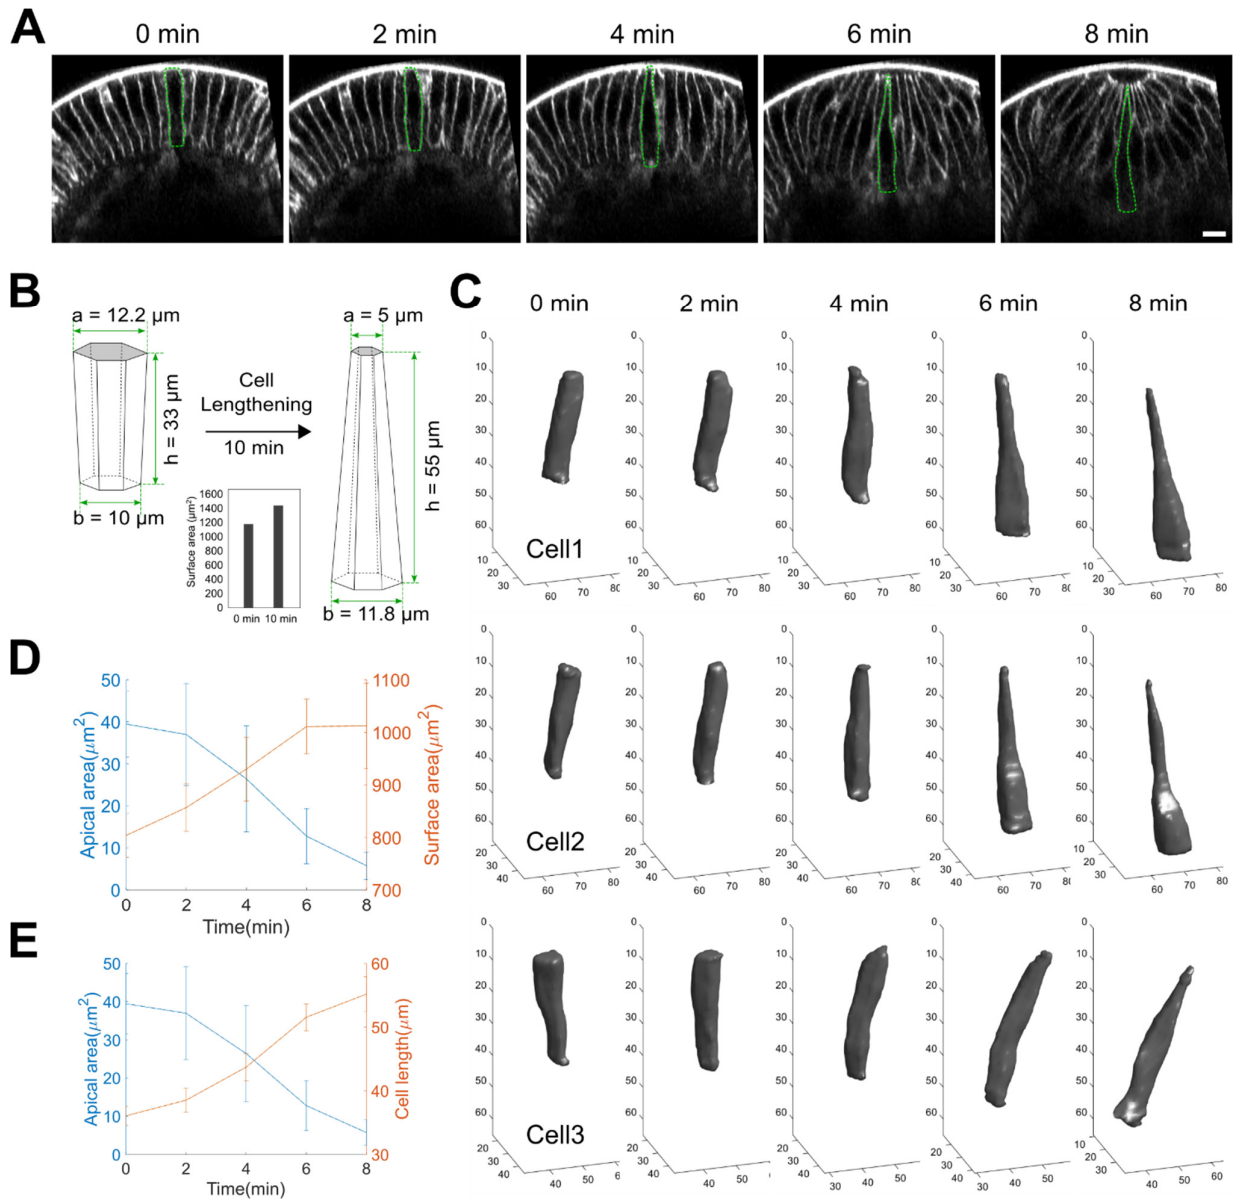

810

811 **Figure 1. Cell surface expands during apical constriction induced cell lengthening.**

812 **(A)** Cross-section view of an embryo expressing E-cadherin-GFP showing ventral furrow formation.

813 Ventral side is up. For each frame, the outline of a single cell is shown as an example. Scale bar: 10

814  $\mu\text{m}$ .

815 **(B)** Predicted cell surface area increase based on the observed cell shape change in the constriction

816 domain.

817 **(C)** Examples of three-dimensional reconstruction of ventral cells from a wildtype embryo during

818 apical constriction.

819 **(D, E)** Apical area and cell length (D) or cell surface area (E) over time during apical constriction.

820 N=15 cells from 3 embryos. Error bars stand for s.d.

821

822 **Figure 2**

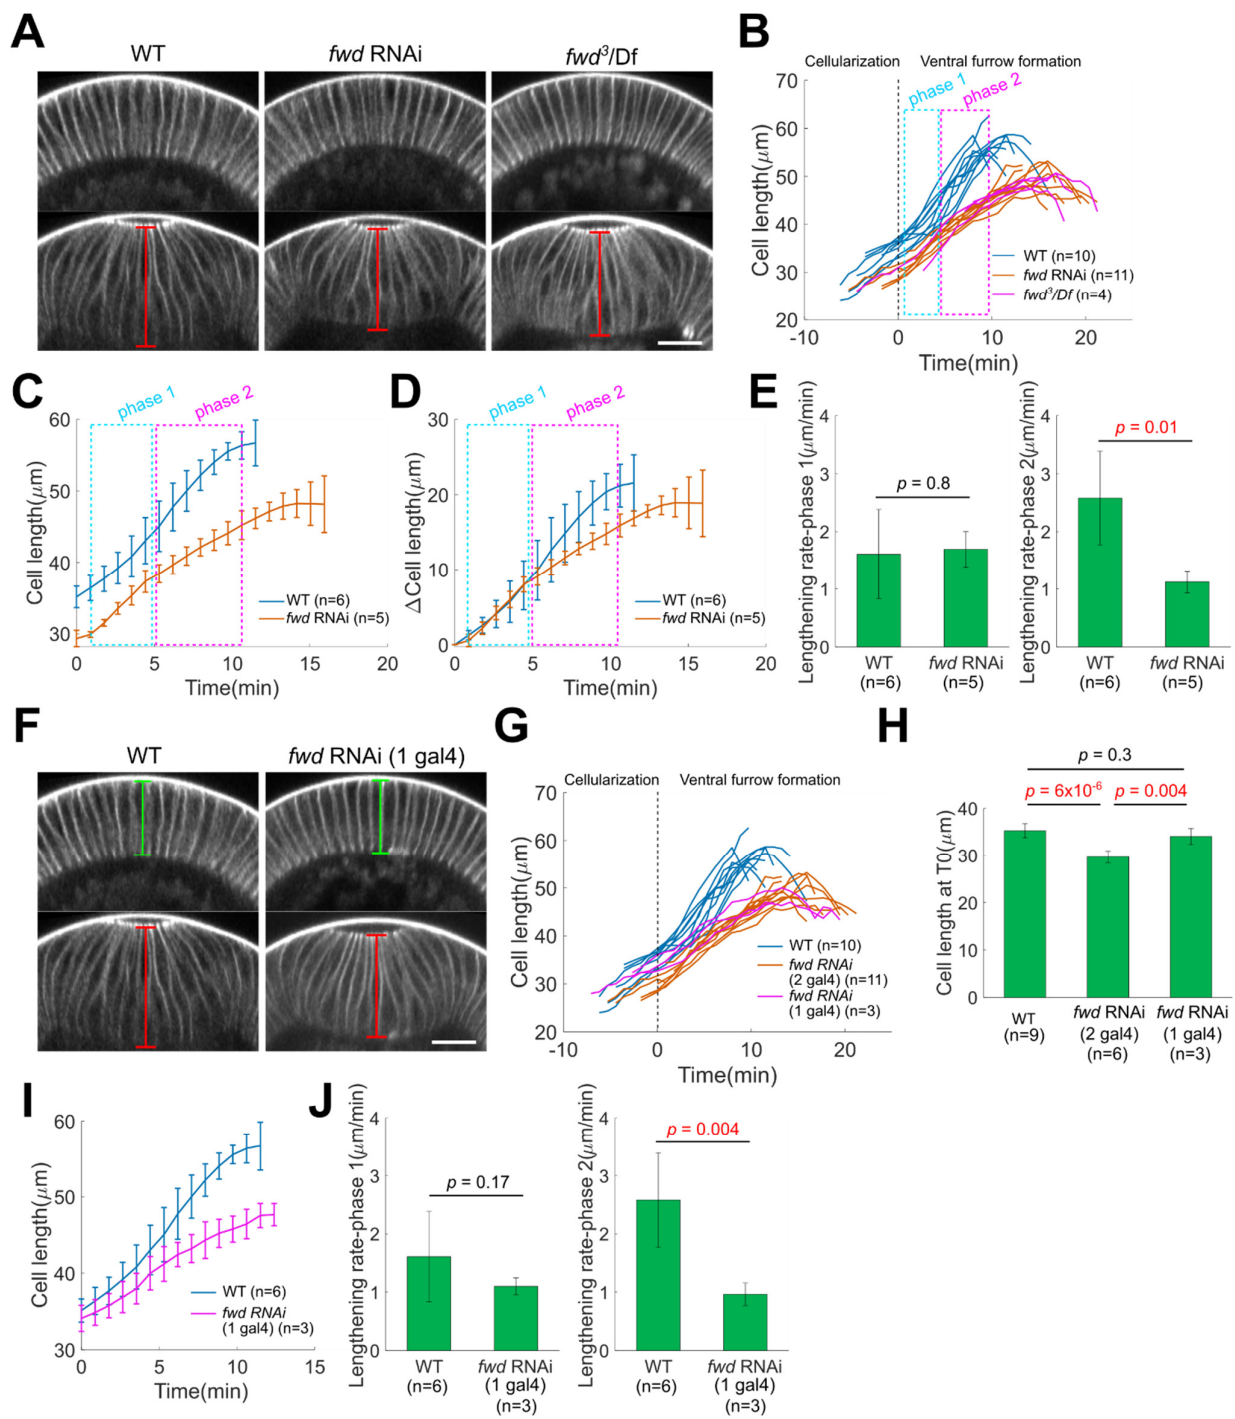

823



824 **Figure 2. Fwd knockdown results in cell lengthening defect during ventral furrow formation.**

825 **(A)** Representative cross-section views showing wildtype, *fwd* RNAi and *fwd* loss of function mutant  
826 embryos at the onset of ventral furrow formation (top) and near lengthening-shortening transition  
827 (bottom). Apical-basal length of the constricting cell at the center of the furrow (red lines) was  
828 measured over time. Scale bar, 20  $\mu$ m.

829 **(B)** Cell length over time for different genotypes. In wildtype embryos, cell lengthening proceeds in  
830 two phases with distinct rates (cyan and magenta boxes). *fwd* loss of function mutants and *fwd* RNAi  
831 embryos exhibit similar lengthening defect. 0 min is defined as the onset of apical constriction  
832 throughout the text.

833 **(C, D)** Average cell length over time before (C) or after (D) subtracting the cell length at 0 min. Error  
834 bars stand for s.d..

835 **(E)** Rate of cell lengthening at phase 1 and phase 2. Error bar stands for s.d..

836 **(F)** Representative cross-section views showing wildtype embryo and *fwd* RNAi embryo with one  
837 copy of Gal4. Top: onset of ventral furrow formation. Bottom: near the lengthening-shortening  
838 transition. Green and red lines indicate cell length at different stages. Scale bar, 20  $\mu$ m.

839 **(G)** Cell length change over time. For G and H, Data for WT and *fwd* RNAi (2 gal4) are reused from  
840 (B).

841 **(H)** Cell length at the end of cellularization. Error bar stands for s.d.. For H – J, Data for WT are  
842 reused from (B).

843 **(I)** Average cell length over time. Error bars stand for s.d..

844 **(J)** Rate of cell lengthening at phase 1 and phase 2. Error bar stands for s.d..

845 Two tailed, unpaired Student's t test is used for all statistical analysis shown in this figure.

846

847 **Figure 3**

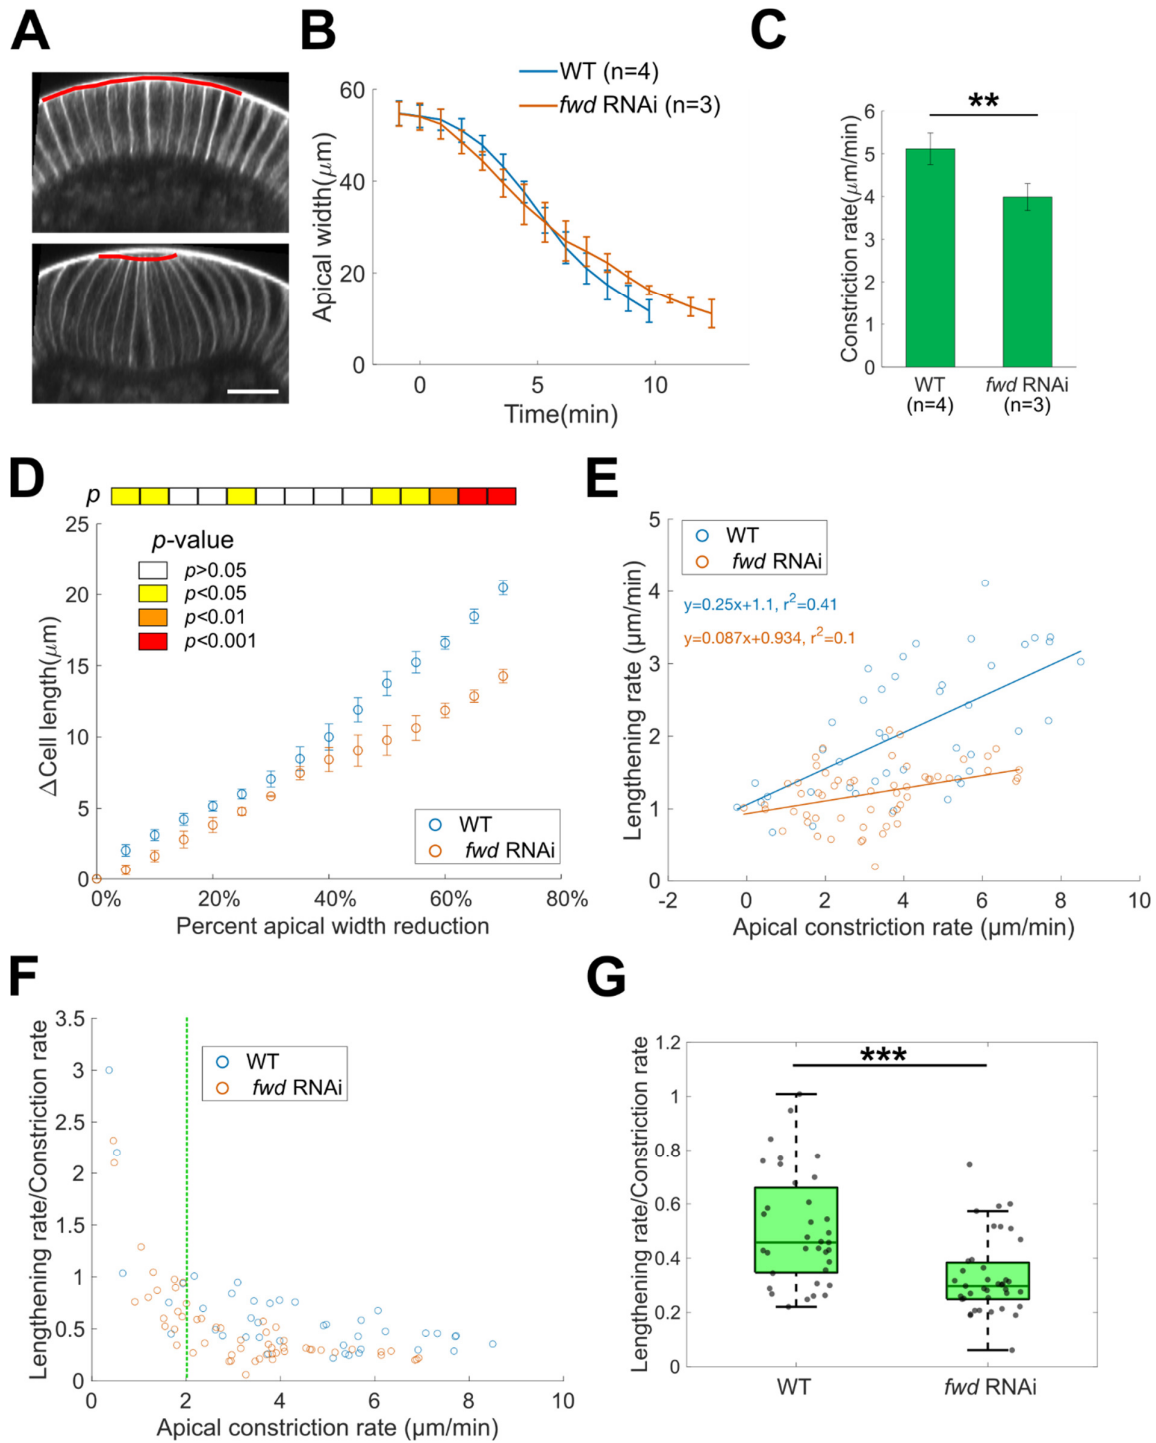

848

849

850 **Figure 3. Knockdown of *fwd* leads to mild defects in apical constriction, but this defect cannot**  
851 **fully account for the defects in cell lengthening**

852 **(A)** Example showing the measurement of apical constriction domain width from the cross-section  
853 views (red lines). A row of ~10 cells centering around ventral midline were measured over time  
854 (Methods).

855 **(B)** Average apical constriction domain width over time. Error bars stand for s.d..

856 **(C)** Constriction rate during 3 – 10 min. \*\*:  $p < 0.01$ . Two tailed, unpaired Student's t test.

857 **(D)** Cell length increase as a function of percentage apical area reduction. With the same degree of  
858 apical constriction, *fwd* RNAi embryos show less cell lengthening compared to wildtype embryos.  
859 Error bars stand for s.e.m.. p-values are shown as a color bar on the top of the plot. Two tailed,  
860 unpaired Student's t test.

861 **(E)** Scatter plot of cell lengthening rate as a function of constriction rate.

862 **(F)** Scatter plot of the ratio between cell lengthening rate and apical constriction rate as a function of  
863 apical constriction rate. For the analysis shown in (G), data points with constriction rate smaller than  
864 2  $\mu\text{m}/\text{min}$  (green dotted line) were excluded.

865 **(G)** Comparison of the cell lengthening rate/apical constriction rate ratio between wildtype and *fwd*  
866 RNAi embryos. \*\*\*:  $p < 0.001$ . Two tailed, unpaired Student's t test.

867

868 **Figure 4**

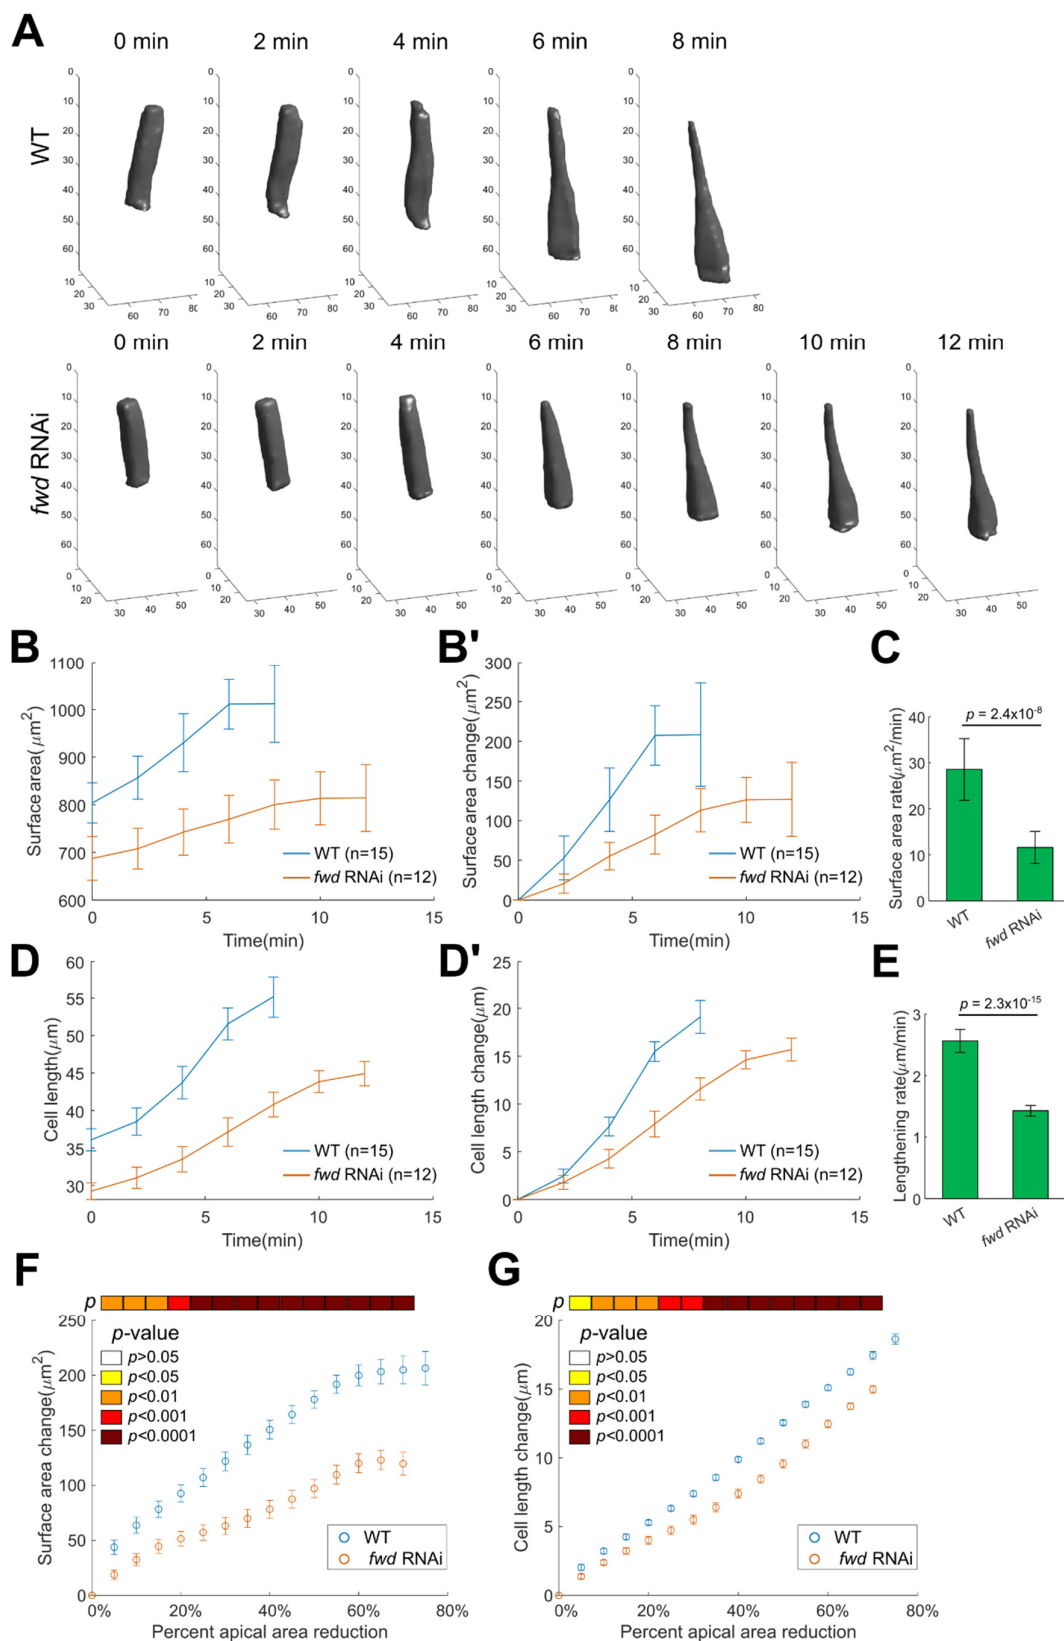

869

870 **Figure 4. Cell lengthening defect in *fwd* RNAi embryos is associated with reduced cell surface**  
871 **expansion.**

872 **(A)** Representative three-dimensional reconstruction of ventral cells undergoing apical constriction  
873 in wildtype and *fwd* RNAi embryos. Image sequence begins at the onset of gastrulation and ends ~ 2  
874 min before lengthening-shortening transition. The wildtype data shown in Figure 1 were reused in  
875 this figure for comparison.

876 **(B, B')** Average cell surface area over time before (B) or after (B') subtracting the value at 0 min.  
877 For wildtype, N=15 cells from 3 embryos; For *fwd* RNAi, N=12 cells from 3 embryos (same below).  
878 Error bars stand for s.d..

879 **(C)** Rate of the surface area change during the lengthening phase. Error bars stand for s.d..

880 **(D, D')** Average cell length over time before (D) or after (D') subtracting the value at 0 min. Error  
881 bars stand for s.d..

882 **(E)** Rate of the cell length change during the lengthening phase. Error bars stand for s.d..

883 **(F, G)** Cell surface area increase (F) and cell length increase (G) measured from 3D reconstructed  
884 cells as a function of the percentage decrease of apical area. The percentage decrease of apical area  
885 was measured by averaging the apical area of 80 wildtype and 72 *fwd* RNAi cells located at the mid-  
886 ventral region of the embryo (from 3 wildtype and 3 *fwd* RNAi embryos, respectively). Error bars  
887 stand for s.e.m.. p-values are shown as a color bar on the top of the plot.

888 Two tailed, unpaired Student's t test is used for all statistical analysis in this figure.

889

890 **Figure 5**

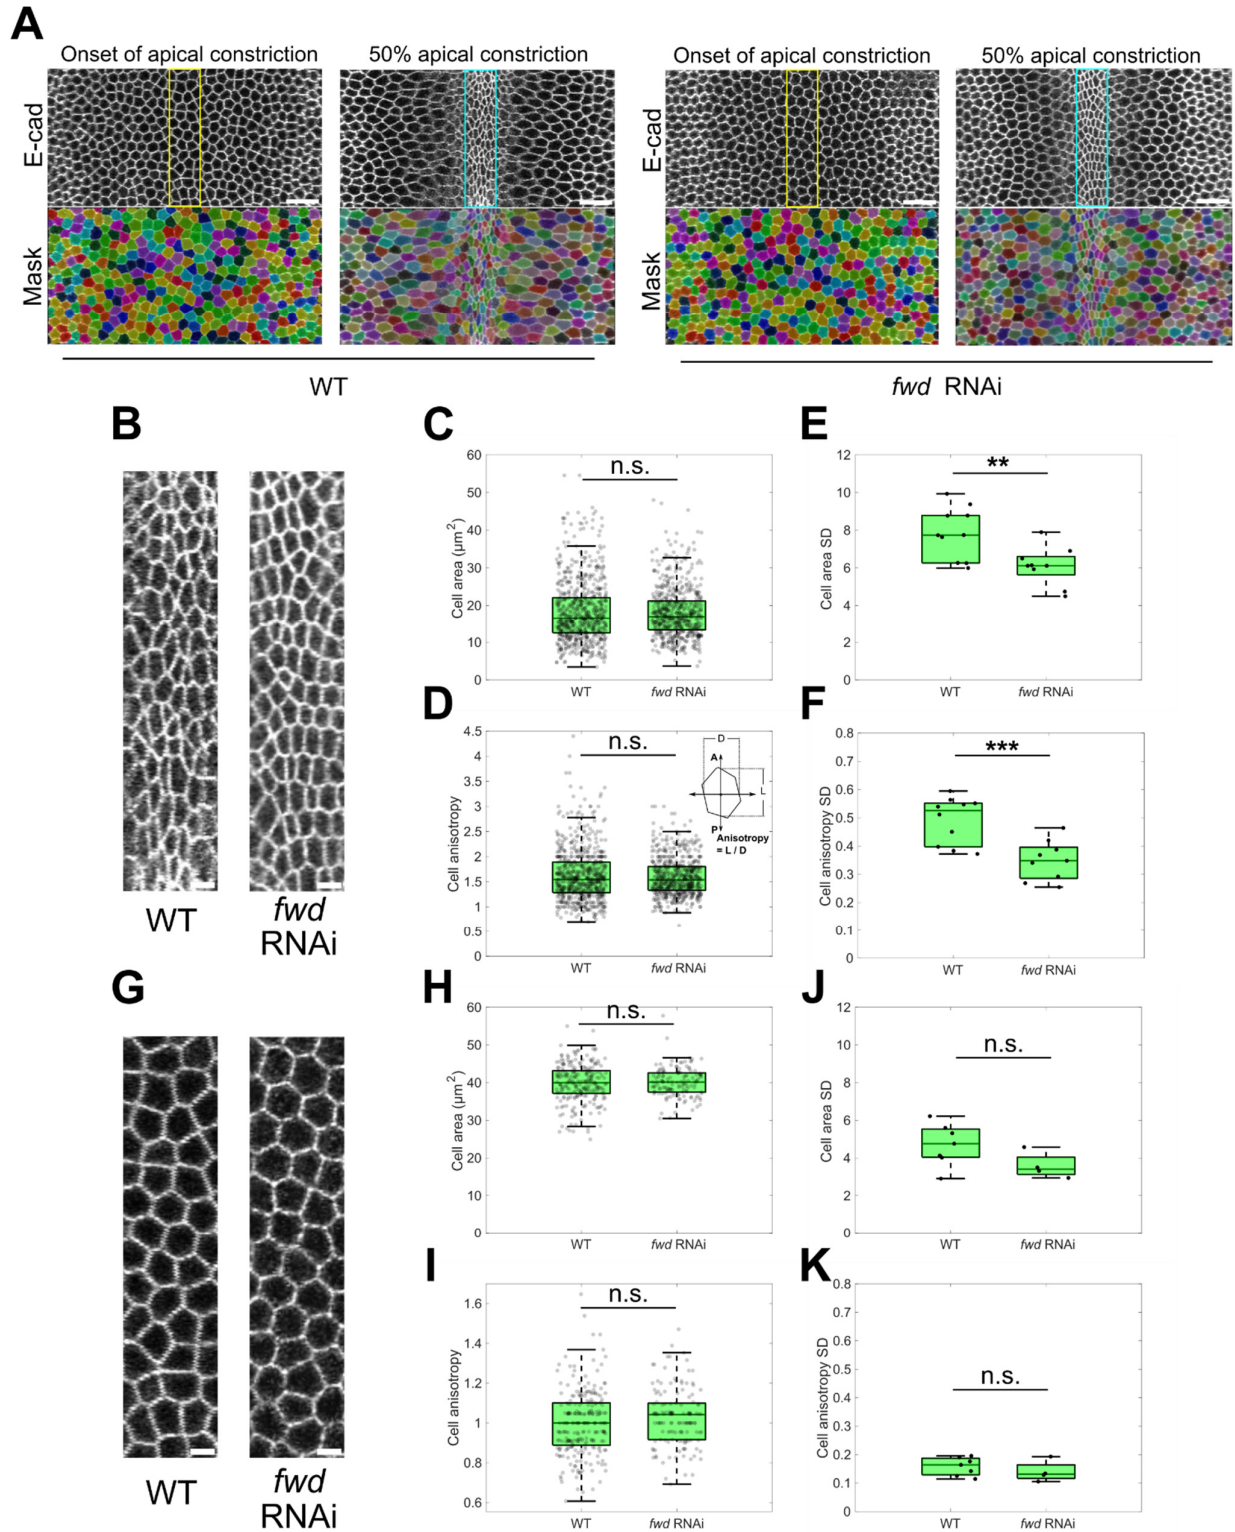

891

892 **Figure 5. Depletion of Fwd results in more uniform cell shape in the constriction domain.**

893 **(A)** Cell segmentation at the ventral surface of the wildtype and *fwd* RNAi embryos at the onset of  
894 apical constriction and when apical area of the constriction domain reduces to ~ 50%. Cyan and  
895 yellow boxes mark cells located at the middle of the constriction domain that were typically used for  
896 analysis in B – F and G – K, respectively. Scale bars, 20  $\mu$ m.

897 **(B)** Zoom-in view of cells inside cyan box in (A). Scale bars, 5  $\mu$ m.

898 **(C-D)** Cell area (C) and anisotropy (D) of individual constricting cells at ~ 50% apical area  
899 reduction. 723 constricting cells from 10 wildtype embryos and 648 constricting cells from 9 *fwd*  
900 RNAi embryos were plotted. n.s.: not significant. Two tailed, unpaired Student's t test.

901 **(E-F)** Standard deviation of cell area (E) and cell anisotropy (F) for constricting cells. Same cells as  
902 in C and D were plotted. \*\*:  $p < 0.01$ ; \*\*\*:  $p < 0.001$ . Two tailed, unpaired Student's t test.

903 **(G)** Zoom-in view of cells inside yellow box in (A). Scale bars, 5  $\mu$ m.

904 **(H-I)** Cell area (H) and anisotropy (I) of individual cells in the middle of the constriction domain at  
905 the onset of apical constriction. 242 constricting cells from 7 wildtype embryos and 139 constricting  
906 cells from 4 *fwd* RNAi embryos were plotted. n.s.: not significant. Two tailed, unpaired Student's t  
907 test.

908 **(J-K)** Standard deviation of cell area (J) and cell anisotropy (K) for constricting cells. Same cells as  
909 in H and I were plotted. n.s.: not significant. Two tailed, unpaired Student's t test.

910

911 **Figure 6**

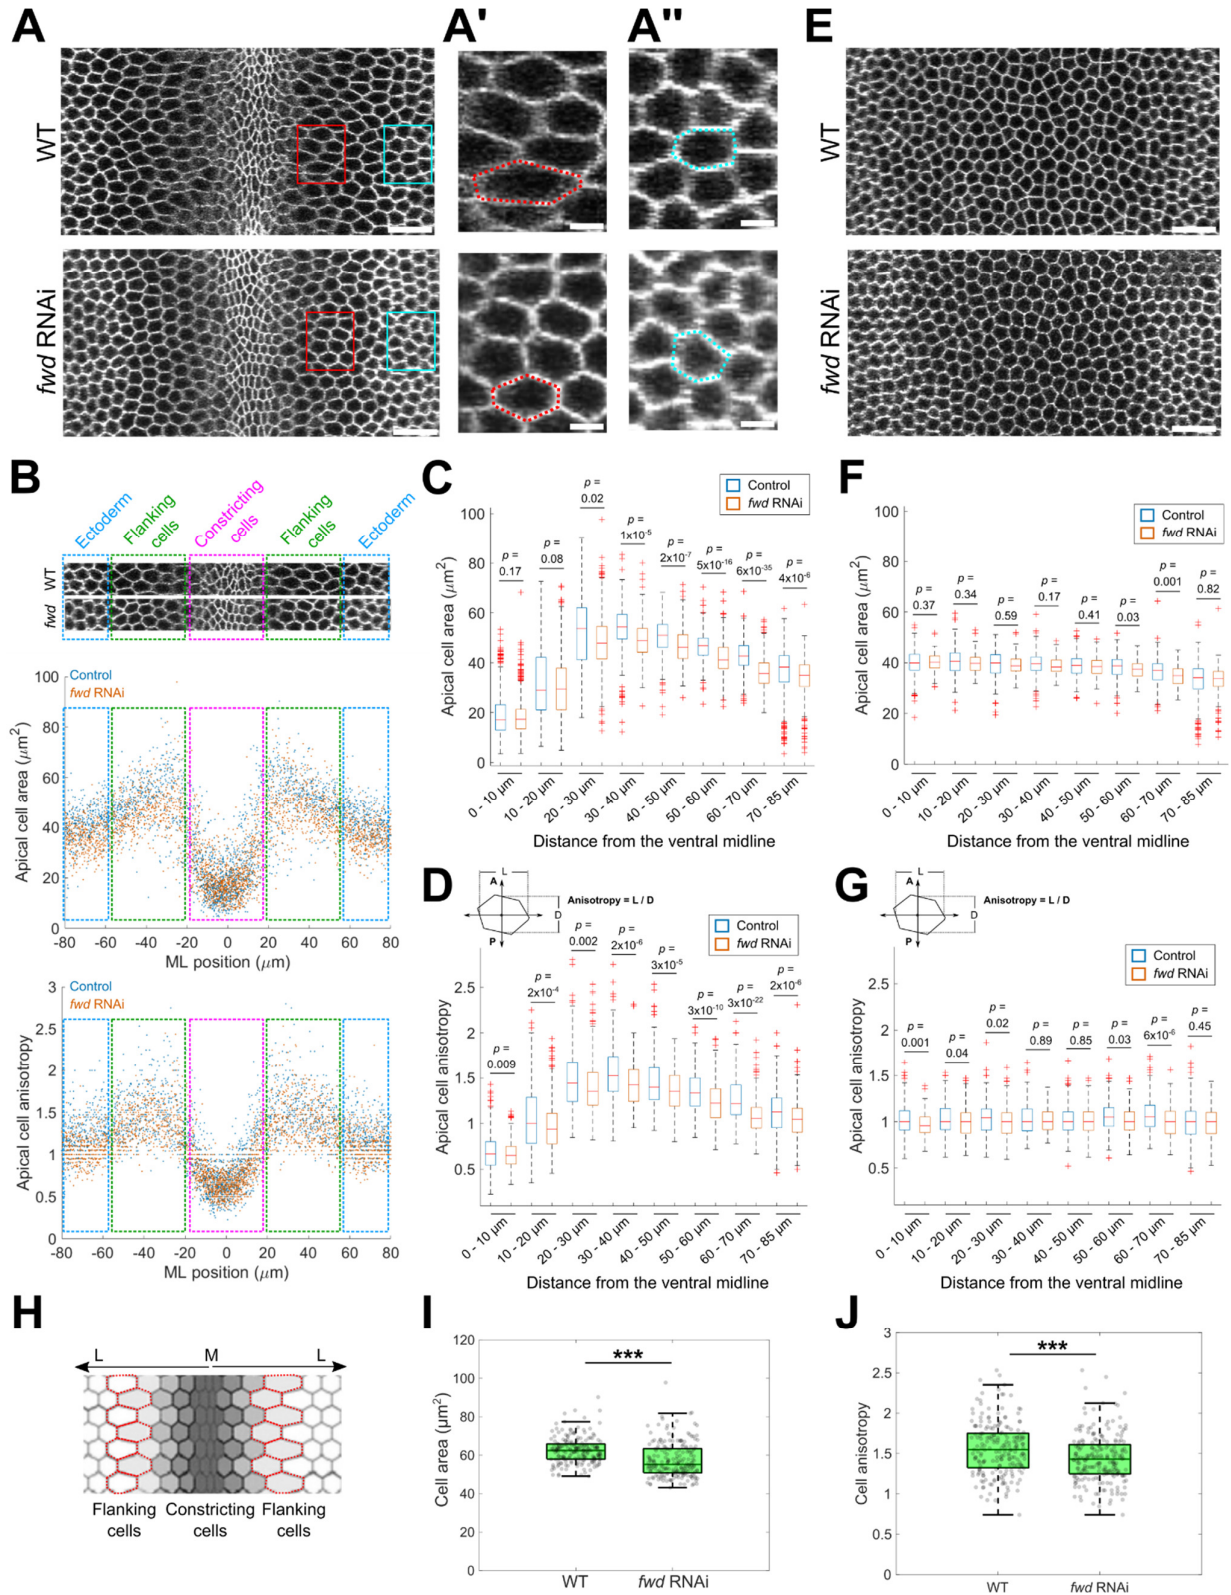

912



913 **Figure 6. Flanking cells are less stretched in *fwd* RNAi embryos than in the control embryos**  
914 **when similar degree of apical constriction is achieved.**

915 **(A)** Surface view of wildtype and *fwd* RNAi embryos when apical area of the constriction domain  
916 reduces to ~ 50%. Scale bars, 20  $\mu\text{m}$ . (A') and (A'') are the zoom-in view of the flanking cell region  
917 and the lateral ectoderm region marked by the red box and cyan box in (A), respectively. Red and  
918 cyan dotted lines show examples of one cell in each genotype. Scale bars, 5  $\mu\text{m}$ .

919 **(B)** Cell area (top) and cell anisotropy (bottom) distribution along mediolateral direction at 50%  
920 apical constriction. 0  $\mu\text{m}$  marks the ventral midline. Different regions are indicated with colored  
921 boxes. Cells from 9 wildtype and 9 *fwd* RNAi embryos were pooled together.

922 **(C, D)** Comparison of cell area (C) and anisotropy (D) between wildtype and *fwd* RNAi embryos at  
923 50% apical constriction for cells located at different distance from the ventral midline. Two tailed,  
924 unpaired Student's t test.

925 **(E)** Surface view of wildtype and *fwd* RNAi embryos before apical constriction. Scale bars, 20  $\mu\text{m}$ .

926 **(F, G)** Comparison of cell area (F) and anisotropy (G) between wildtype and *fwd* RNAi embryos  
927 before apical constriction. Cells from 7 wildtype and 4 *fwd* RNAi embryos were pooled together.  
928 Two tailed, unpaired Student's t test.

929 **(H-J)** Apical area and anisotropy of the most stretched cells along the mediolateral at 50% apical  
930 constriction. (H) The most stretched cells in each row of cells (red outlines) that are quantified in (I)  
931 and (J). (I) Apical cell area. (J) Apical cell anisotropy. Wildtype: N=203 cells from 9 embryos; *fwd*  
932 RNAi: N=210 cells from 9 embryos. \*\*\*:  $p < 0.001$ . Two tailed, unpaired Student's t test.

933

934

## Figure 7

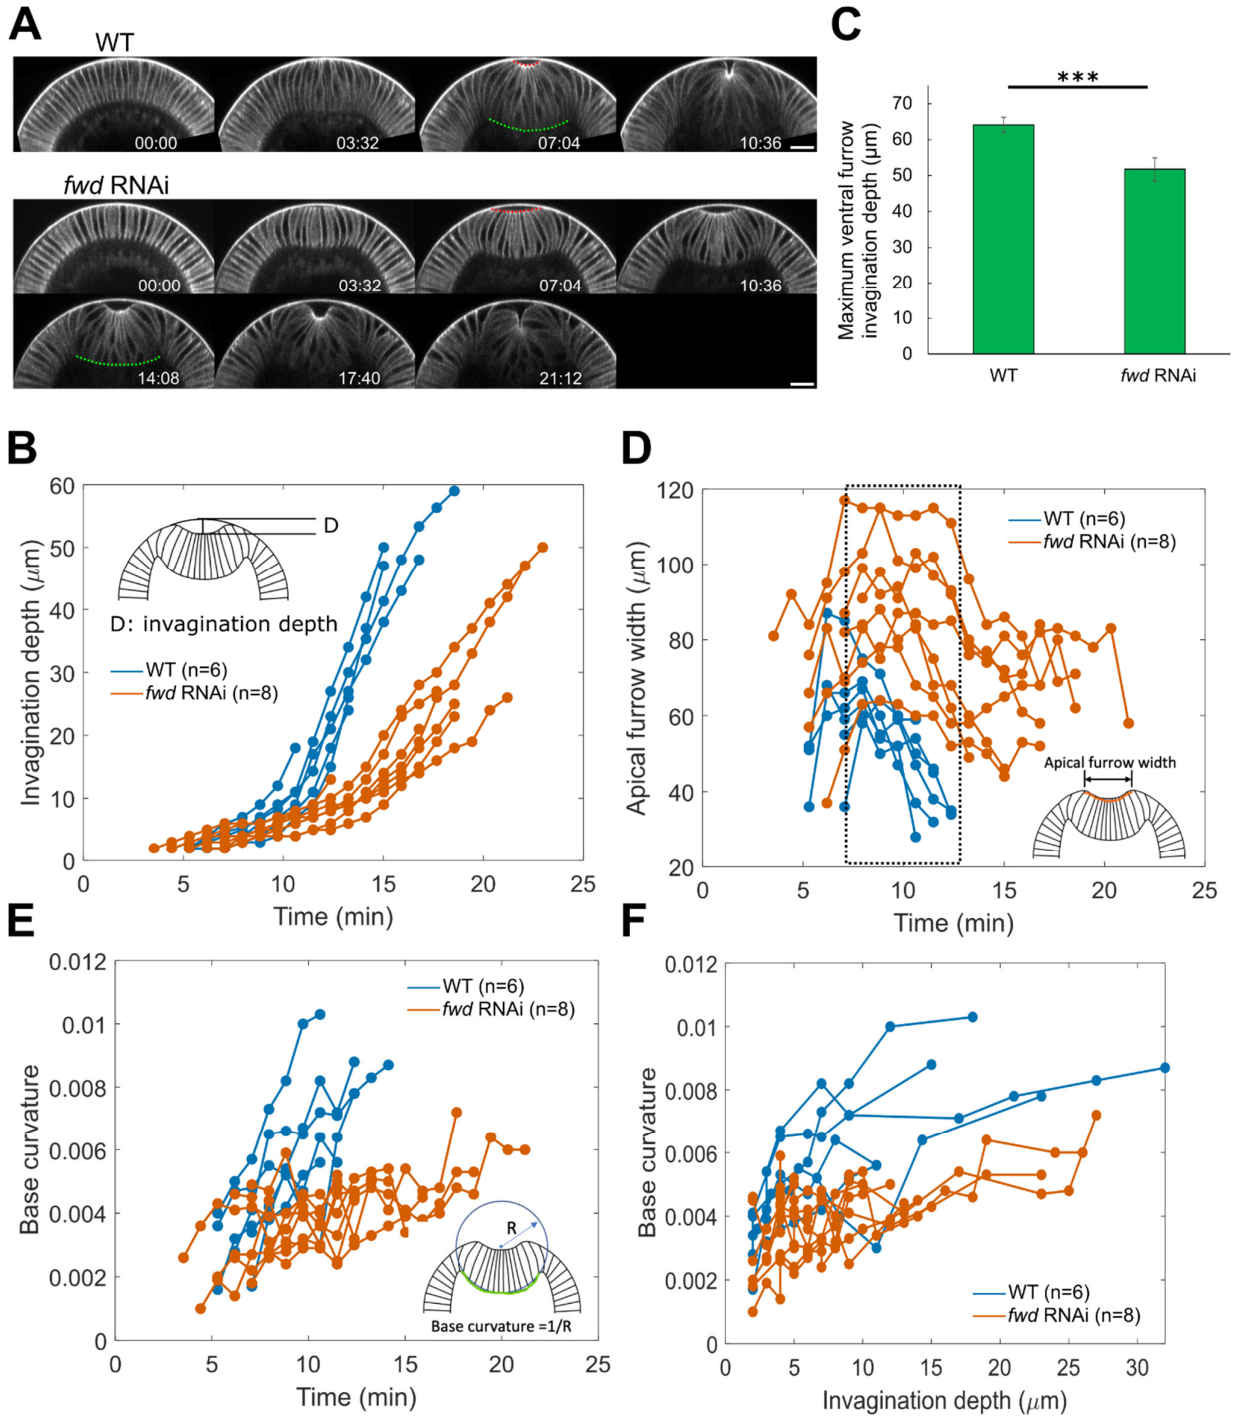

935

936 **Figure 7. Depletion of Fwd results in slower ventral furrow invagination and abnormal furrow**  
937 **morphology.**

938 **(A)** Representative movie stills showing the cross-section view of ventral furrow for wildtype and  
939 *fwd* RNAi embryos. Scale bars, 20 $\mu$ m.

940 **(B)** Invagination depth over time. For all the quantifications in this figure, N=6 embryos for  
941 wildtype, N=8 embryos for *fwd* RNAi embryos unless otherwise mentioned.

942 **(C)** Maximum invagination depth. N=4 embryos for both wildtype and *fwd* RNAi embryos. Error  
943 bars stand for s.d., \*\*\*:  $p < 0.001$ . Two tailed, unpaired Student's t test.

944 **(D)** Apical furrow width over time. Dashed box indicates a prolonged phase with wide open furrow  
945 in *fwd* RNAi embryos.

946 **(E)** Furrow base curvature over time.

947 **(F)** Furrow base curvature as a function of invagination depth. Furrow base curvature is higher in the  
948 control embryos than in *fwd* RNAi embryos at comparable invagination depth.

949

950 **Figure 8**

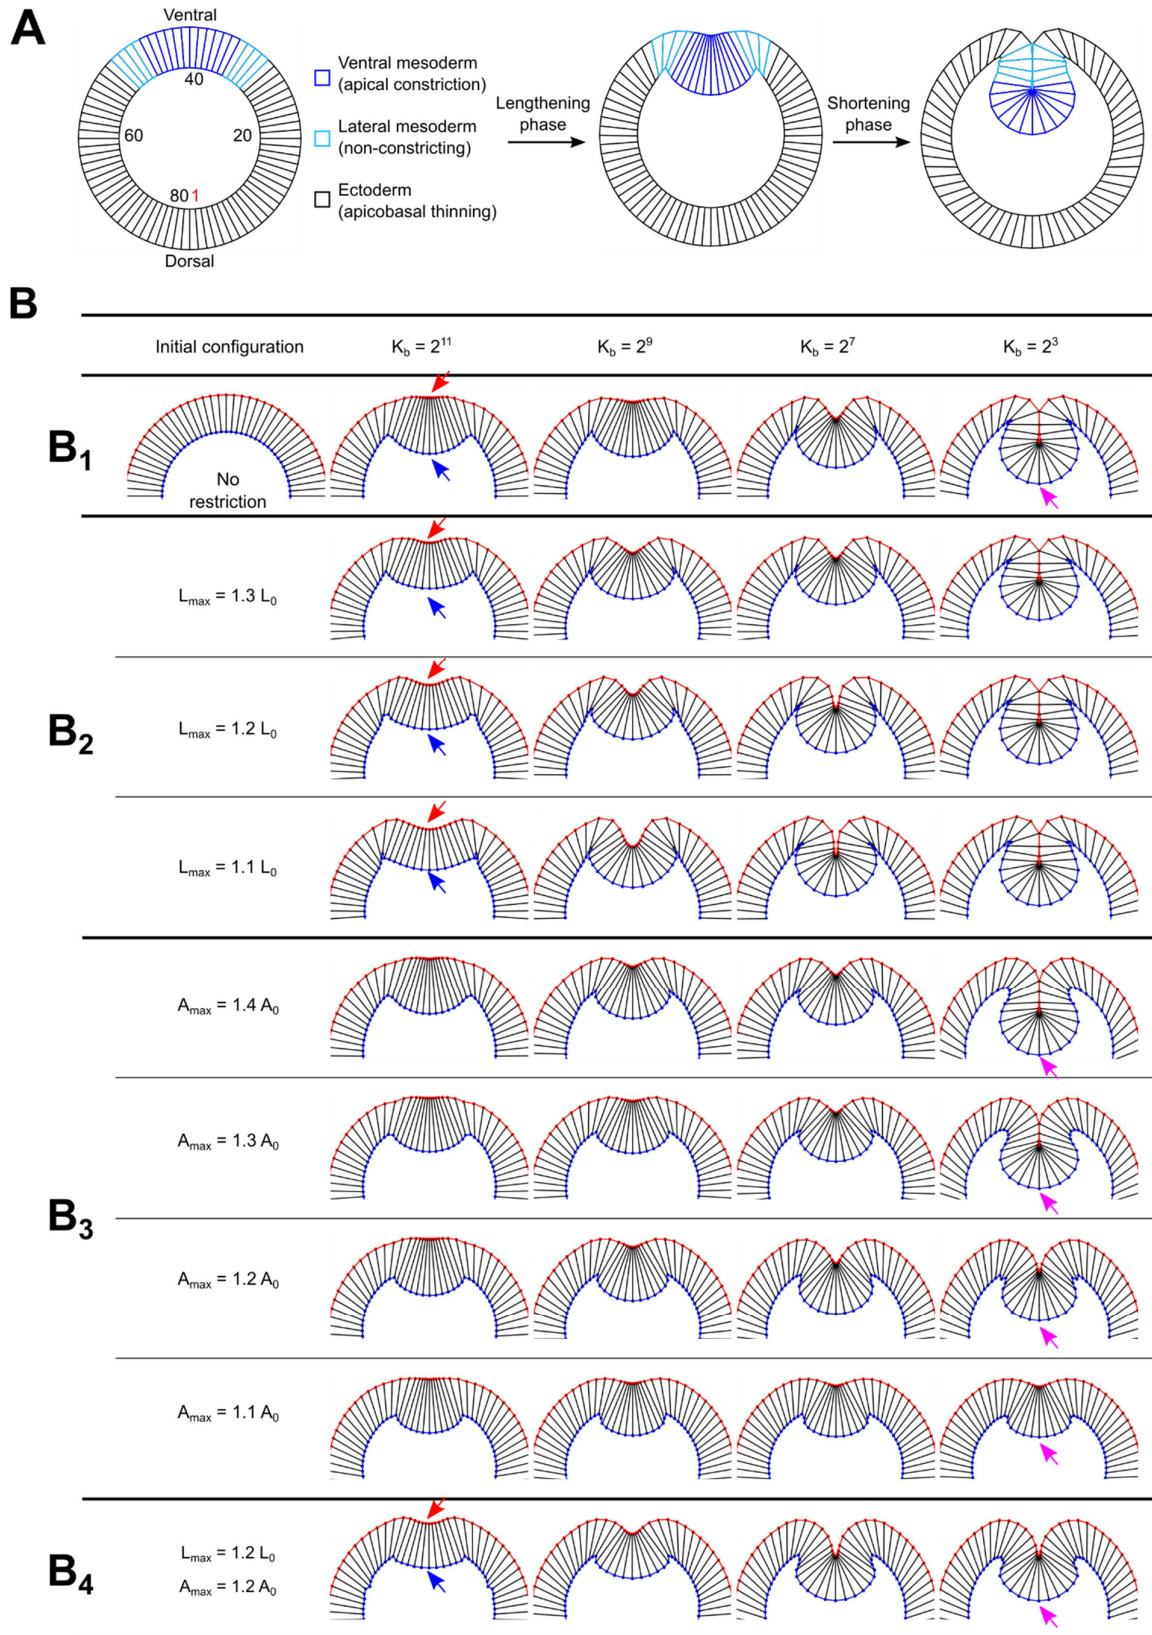

951

952 **Figure 8. Simulation shows distinct impact of restricting apical and lateral surface expansion**  
953 **on ventral furrow formation.**

954 **(A)** 2D vertex model testing the impact of defects in cell surface expansion on ventral furrow  
955 formation. The model considers the cross-section view of the embryo, which contains a ring of 80  
956 columnar-shaped cells. In the model, the cortices of cells resist deformations as elastic springs, and  
957 the cells have a strong propensity to maintain constant volume. The model is driven out of  
958 equilibrium by apical constriction in the ventral mesoderm (the upmost 12 cells). In addition, the  
959 ectodermal cells located outside of the mesoderm domain undergo apical-basal shortening of the  
960 ectoderm (Methods).

961 **(B)** Simulation results ( $B_1 - B_4$ ).

962 **(B<sub>1</sub>)** When simulating normal ventral furrow formation, the model transitions through a series of  
963 equilibrium states governed by a stepwise reduction of basal stiffness ( $K_b$ ).

964 **(B<sub>2</sub>)** Ventral furrow formation when the maximal elongation of the lateral membrane ( $L_{max}$ ) is  
965 constrained to 1.3-, 1.2- and 1.1-fold of its original length  $L_0$ . As the constraint on  $L_{max}$  increases, the  
966 morphology of the intermediate furrow becomes increasingly abnormal, featured by a wider apical  
967 indentation (red arrows) and a flatter base (blue arrows). On the other hand, the final invagination  
968 depth is not affected.

969 **(B<sub>3</sub>)** Ventral furrow formation when the maximal elongation of the apical membrane ( $A_{max}$ ) is  
970 constrained to 1.4-, 1.3-, 1.2- and 1.1-fold of its original length  $A_0$ . As the constraint on  $A_{max}$   
971 increases, the final furrow depth becomes increasingly smaller (magenta arrows). The intermediate  
972 furrow morphology is not substantially affected.

973 **(B<sub>4</sub>)** When both  $L_{max}$  and  $A_{max}$  are constrained to 1.2-fold of their original length, the effects are  
974 additive, and the model shows defects in both intermediate furrow morphology and the final  
975 invagination depth, which recapitulate the ventral phenotype in *fwd* deficient embryos.

976

977 **Figure 9**

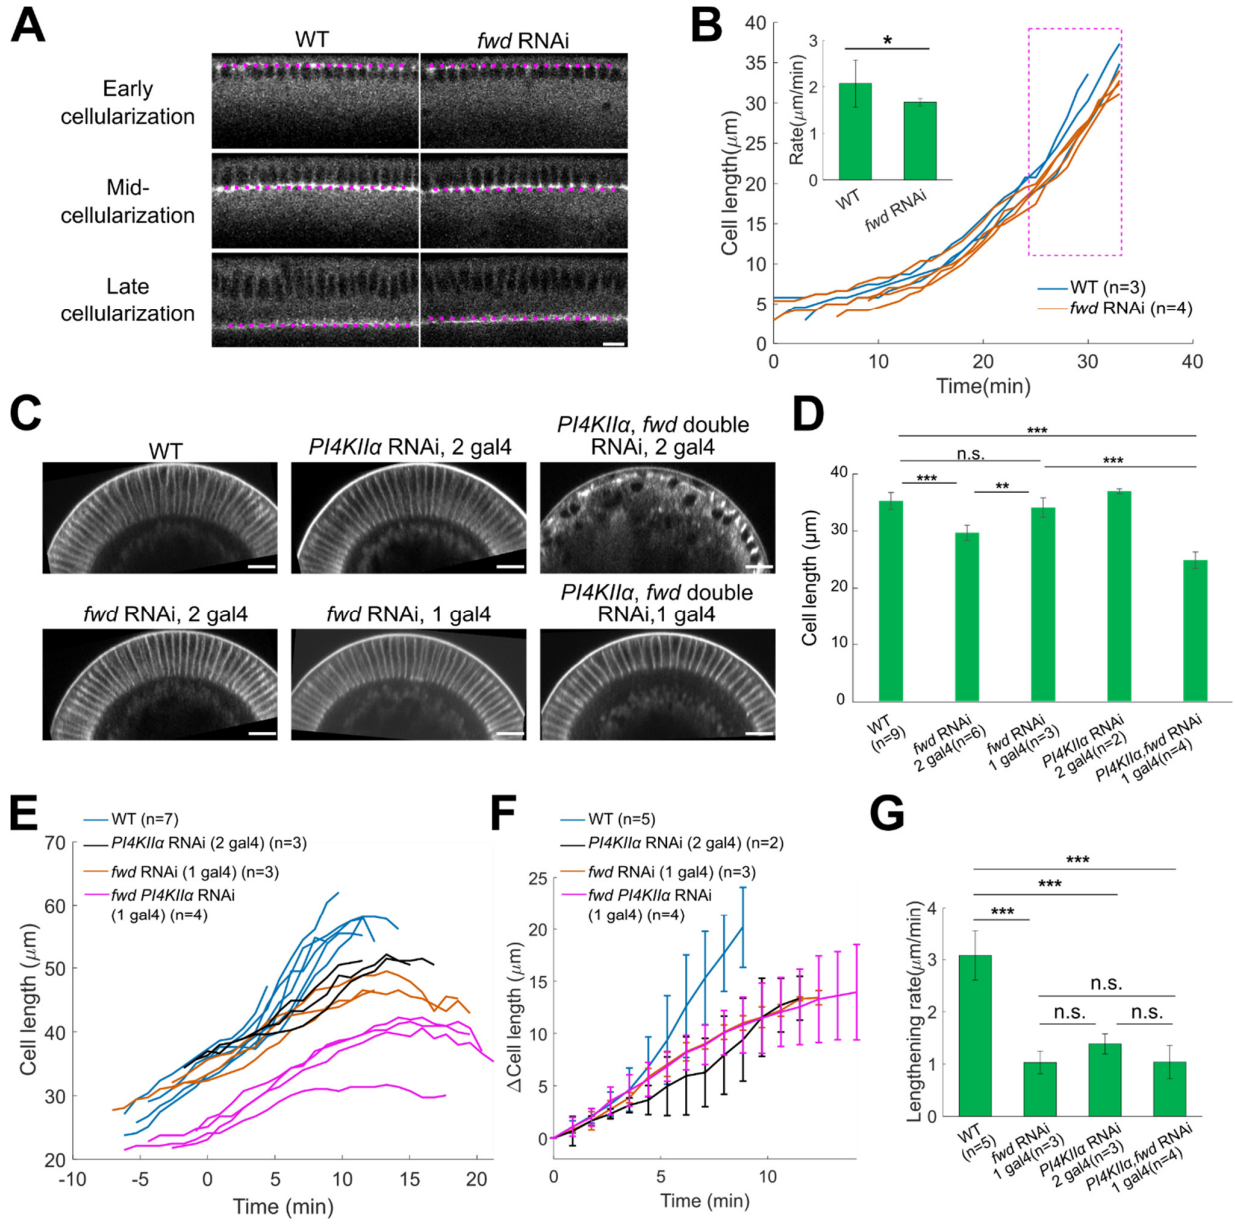

978

979 **Figure 9. Fwd and PI4KII $\alpha$  function redundantly in cell membrane growth during**  
980 **cellularization**

981 **(A)** Membrane growth during cellularization in wildtype and *fwd RNAi* embryos. Midsagittal plane  
982 images at the dorsal side of the embryo were taken over time. Cellularization front (magenta dotted  
983 lines) was visualized by Sqh-mCherry. Scale bar, 10  $\mu$ m.

984 **(B)** Cell length over time during cellularization. Time 0 is the time point when the cellularization  
985 front reaches the top of the nuclear. For embryos missing time 0, embryos are aligned based on the  
986 general trend of cleavage furrow ingression. Inset shows the rate of furrow ingression during late  
987 cellularization (magenta box). Error bar stands for s.d.; \*:  $p < 0.05$ ; One-sided Wilcoxon rank sum  
988 test.

989 **(C)** Representative cross-section view images of embryos from different genetic background at the  
990 end of cellularization. Scale bars, 20  $\mu$ m.

991 **(D)** Quantification of cell length at the end of cellularization for different genetic background. Error  
992 bar stands for s.d.; n.s.: not significant; \*\*\*:  $p < 0.001$ ; \*\*:  $p < 0.01$ ; Two tailed, unpaired Student's t  
993 test.

994 **(E)** The length of the apically constricting cells over time during apical constriction for embryos  
995 from the indicated genetic backgrounds. 0 min represents the onset of gastrulation.

996 **(F)** Average length of the apically constricting cells over time during apical constriction. Error bar  
997 stands for s.d..

998 **(G)** Rate of cell lengthening at phase 2. Error bar stands for s.d.. n.s.: not significant; \*\*\*:  $p < 0.001$ ;  
999 Two tailed, unpaired Student's t test.

1000
